# Supplementary material for: Methodological considerations for identifying multiple plasma proteins associated with all-cause mortality in a population-based prospective cohort
Source: PubMed Central journal article supplement (PMC7990913; doi:10.1038/s41598-021-85991-z), 2021-03-24
Supplement: 41598_2021_85991_MOESM1_ESM.pdf [file 41598_2021_85991_MOESM1_ESM.pdf]

## **Supplementary material**

Methodological considerations for identifying multiple plasma proteins associated with all-cause mortality in a population-based prospective cohort

Authors: Isabel Drake, George Hindy, Peter Almgren, Gunnar Engström, Jan Nilsson, Olle Melander, Marju Orho-Melander

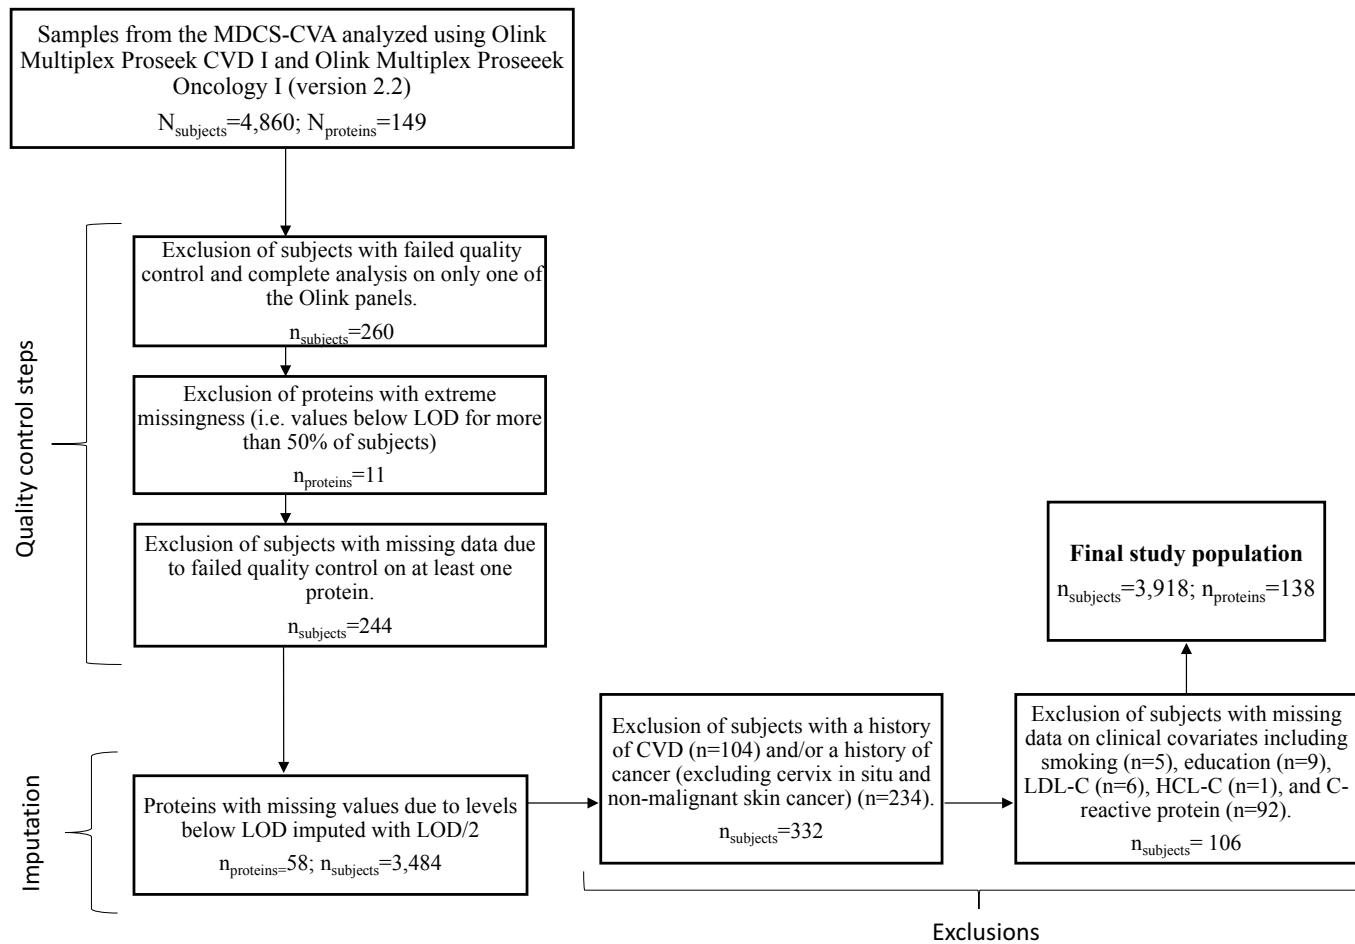

**Supplement Figure 1.** Flow chart of study participants including protein quality control steps, imputation, and study exclusions the Malmö Diet and Cancer Study Cardiovascular Arm (MDCS-CVA).

**Supplement Table 1.** Description of the 138 plasma proteins passing quality control in the MDCS-CVA (N=4356). Standardized mean values are in arbitrary units (AU). NA denotes that there are no subjects with imputed protein values.

| Protein name (abbreviation)                         | Panel    | Mean (range)    | Limit of detection (LOD) | N imputed with LOD/2 |
|-----------------------------------------------------|----------|-----------------|--------------------------|----------------------|
| Adrenomedullin (AM)                                 | CVD/Onco | 6.1 (2.9-8.1)   | 1.00                     | NA                   |
| Agouti-related protein (AGRP)                       | CVD      | 4.2 (2.3-7.4)   | 0.50                     | NA                   |
| Amphiregulin (AR)                                   | Onco     | 1.8 (0.4-8.2)   | 0.76                     | 29                   |
| Angiotensin-1 receptor (TIE2)                       | CVD/Onco | 6.1 (4.1-7.8)   | 1.40                     | NA                   |
| B-cell activating factor (BAFF)                     | Onco     | 6 (0.8-8.3)     | 1.53                     | 1                    |
| C-C motif chemokine 19 (CCL19)                      | Onco     | 9.4 (6.7-13.4)  | 1.23                     | NA                   |
| C-C motif chemokine 20 (CCL20)                      | CVD      | 5.5 (2.1-11.8)  | 1.10                     | NA                   |
| C-C motif chemokine 3 (CCL3)                        | CVD      | 1.1 (0.1-7.7)   | 0.20                     | 78                   |
| C-C motif chemokine 4 (CCL4)                        | CVD      | 7.2 (4.7-12.1)  | 1.20                     | NA                   |
| C-X-C motif chemokine 1 (CXCL1)                     | CVD      | 7.3 (4.2-10.4)  | 1.60                     | NA                   |
| C-X-C motif chemokine 10 (CXCL10)                   | Onco     | 7.0 (0.4-11.4)  | 0.40                     | 1                    |
| C-X-C motif chemokine 11 (CXCL11)                   | Onco     | 4.1 (0.9-10.1)  | 1.72                     | 6                    |
| C-X-C motif chemokine 13 (CXCL13)                   | Onco     | 8.1 (0.2-12.7)  | 0.49                     | 88                   |
| C-X-C motif chemokine 5 (CXCL5)                     | Onco     | 9.9 (4.4-12)    | 0.19                     | NA                   |
| C-X-C motif chemokine 6 (CXCL6)                     | CVD      | 6.4 (3.5-10.0)  | 1.40                     | NA                   |
| C-X-C motif chemokine 9 (CXCL9)                     | Onco     | 6.4 (0.4-11.3)  | 0.82                     | 1                    |
| C-X-C motif chemokine-16 (CXCL16)                   | CVD      | 2.8 (0.9-4.8)   | 1.80                     | 24                   |
| Cadherin-3 (CDH3)                                   | Onco     | 1.5 (0.1-4.0)   | 0.11                     | 12                   |
| Carbonic anhydrase IX (CAIX)                        | Onco     | 2 (0.3-7.4)     | 0.54                     | 72                   |
| Caspase-3 (CASP3)                                   | Onco     | 10.7 (5.6-13.5) | 2.82                     | NA                   |
| Caspase-8 (CASP8)                                   | CVD      | 1.5 (0.1-5.0)   | 0.20                     | 62                   |
| Cathepsin D (CTSD)                                  | CVD      | 6.8 (4.0-8.9)   | 3.30                     | NA                   |
| Cathepsin L1 (CTSL1)                                | CVD      | 5.5 (3.5-7.5)   | 1.0                      | NA                   |
| CD40 ligand (CD40L)                                 | CVD/Onco | 7.8 (3.4-11.7)  | 2.5                      | NA                   |
| Chitinase-3-like protein (CH3L1)                    | CVD      | 5.3 (1.6-10.1)  | 3.20                     | 12                   |
| Cyclin-dependent kinase inhibitor 1A (CDKN1A)       | Onco     | 2 (0.2-5.8)     | 0.34                     | 114                  |
| Cystatin-B (CSTB)                                   | CVD/Onco | 4.7 (1.0-8.9)   | 1.90                     | 1                    |
| Dickkopf-related protein-1 (Dkk1)                   | CVD      | 5.7 (3.2-8.7)   | 0.50                     | NA                   |
| E-selectin (SELE)                                   | CVD/Onco | 5.0 (2.6-11.0)  | 1.50                     | NA                   |
| Early activation antigen CD69 (CD60)                | Onco     | 8.5 (0.5-11.5)  | 0.91                     | 1                    |
| Endothelial cell-specific molecule 1 (ESM1)         | CVD      | 2.9 (0.9-5.3)   | 0.60                     | NA                   |
| Eosinophil cationic protein (ECP)                   | CVD      | 5.0 (0.8-7.5)   | 1.60                     | 2                    |
| Epidermal growth factor (EGF)                       | CVD      | 7.1 (2.4-10.6)  | 0.40                     | NA                   |
| Epidermal growth factor receptor (EGFR)             | Onco     | 5.6 (2.1-7.2)   | 0.11                     | NA                   |
| Epididymal secretory protein E4 (HE4)               | Onco     | 6.5 (3.6-8.6)   | 1.27                     | NA                   |
| Epithelial cell adhesion molecule (EpCAM)           | Onco     | 9.9 (6.7-12.9)  | 1.54                     | NA                   |
| Eukaryotic translation initiation factor 4B (eIF4B) | Onco     | 6.5 (2.0-8.3)   | 1.84                     | NA                   |

|                                                                            |          |                |       |     |
|----------------------------------------------------------------------------|----------|----------------|-------|-----|
| Extracellular matrix metalloproteinase inducer (EMMPRIN)                   | Onco     | 6.1 (0.03-7.1) | 0.05  | 1   |
| Ezrin (EZR)                                                                | Onco     | 4.1 (2.1-6.2)  | 1.42  | NA  |
| Fas antigen ligand (FasL)                                                  | Onco     | 1.3 (0.1-4.5)  | 0.28  | 74  |
| FAS-associated death domain protein (FADD)                                 | Onco     | 2.5 (1.1-5.9)  | 0.25  | 5   |
| Fatty acid-binding protein, adipocyte (FABP4)                              | CVD      | 2.4 (0.7-5.2)  | 1.3   | 153 |
| Fibroblast growth factor 23 (FGF23)                                        | CVD      | 1.8 (0.0-6.9)  | 0.0   | NA  |
| Fms-related tyrosine kinase 3 ligand (Flt3L)                               | Onco     | 8.1 (5.5-10.0) | 0.94  | NA  |
| Folate receptor alpha (FRalpha)                                            | Onco     | 4.1 (1.0-7.1)  | 0.0   | NA  |
| Follistatin (FS)                                                           | CVD/Onco | 4.8 (2.2-7.5)  | 1.7   | NA  |
| Fractalkine (CX3CL1)                                                       | CVD      | 5.0 (3.1-7.2)  | 2.3   | NA  |
| Furin (FUR)                                                                | Onco     | 6.5 (4.6-8.3)  | 0.43  | NA  |
| Galanin peptides (GAL)                                                     | CVD      | 5.0 (1.4-7.6)  | 0.9   | NA  |
| Galectin-3 (Gal3)                                                          | CVD      | 5.1 (3.0-7.1)  | 1.8   | NA  |
| Growth hormone (GH)                                                        | CVD/Onco | 8.3 (2.8-12.3) | 1.8   | NA  |
| Growth/differentiation factor 15 (GDF15)                                   | CVD/Onco | 8.7 (6.1-11.8) | 2.6   | NA  |
| Heat shock 27 kDa protein (HSP27)                                          | CVD      | 4.7 (0.6-6.7)  | 1.1   | 1   |
| Heparin-binding EGF-like growth factor (HBEGF)                             | CVD/Onco | 4.5 (2.9-6.5)  | 0.8   | NA  |
| Hepatocyte growth factor (HGF)                                             | CVD/Onco | 6.2 (3.9-10.1) | 1.3   | NA  |
| ICOS ligand (ICOSLG)                                                       | Onco     | 3.2 (1.4-5.2)  | 1.23  | NA  |
| Immunoglobulin-like transcript 3 (ILT3)                                    | Onco     | 1.8 (0.3-4.8)  | 0.55  | 17  |
| Integrin alpha-1 (ITGA1)                                                   | Onco     | 6.3 (2.7-8.0)  | 0.63  | NA  |
| Interleukin-1 receptor antagonist protein (IL1ra)                          | CVD/Onco | 3.9 (1.7-7.6)  | 3.4   | 616 |
| Interleukin-12 (IL12)                                                      | Onco     | 7.6 (0.7-10.8) | 1.44  | 1   |
| Interleukin-16 (IL16)                                                      | CVD      | 3.7 (1.3-6.4)  | 0.0   | NA  |
| Interleukin-17 receptor B (IL17RB)                                         | Onco     | 1.4 (0.1-4.6)  | 0.27  | 160 |
| Interleukin-18 (IL18)                                                      | CVD      | 9.9 (6.7-12.7) | 2.3   | NA  |
| Interleukin-27 subunit alpha (IL27A)                                       | CVD      | 1.8 (0.2-3.3)  | 0.4   | 1   |
| Interleukin-6 (IL6)                                                        | CVD/Onco | 4.4 (1.8-12)   | 1.2   | NA  |
| Interleukin-6 receptor subunit alpha (IL6RA)                               | CVD/Onco | 8.7 (6.6-10.3) | 3.7   | NA  |
| Interleukin-7 (IL7)                                                        | Onco     | 1.3 (-0.1-5.5) | -0.06 | 55  |
| Interleukin-8 (IL8)                                                        | CVD/Onco | 4.7 (1.3-11.2) | 2.5   | 2   |
| Kallikrein-11 (hK11)                                                       | CVD/Onco | 4.9 (1.2-8.9)  | 2.3   | 1   |
| Kallikrein-6 (KLK6)                                                        | CVD/Onco | 6.3 (3.8-8.8)  | 1.8   | NA  |
| Latency-associated peptide transforming growth factor beta-1 (LAPTGFbeta1) | Onco     | 5.3 (3.0-7.8)  | 0.53  | NA  |
| Lectin-like oxidized LDL receptor (LOX1)                                   | CVD      | 4.1 (1.9-7.4)  | 1.3   | NA  |
| Leptin (LEP)                                                               | CVD      | 2.7 (0.1-5.4)  | 0.2   | 91  |
| Macrophage colony-stimulating factor-1 (CSF1)                              | CVD/Onco | 8.5 (6.1-10.2) | 1.6   | NA  |
| Matrix metalloproteinase-1 (MMP1)                                          | CVD/Onco | 2.9 (0.1-7.7)  | 0.1   | 5   |
| Matrix metalloproteinase-10 (MMP10)                                        | CVD      | 6.0 (3.3-10.0) | 1.3   | NA  |
| Matrix metalloproteinase-12 (MMP12)                                        | CVD      | 6.6 (3.6-9.8)  | 0.6   | NA  |
| Matrix metalloproteinase-3 (MMP3)                                          | CVD      | 0.2 (-1.8-4.4) | -0.9  | 81  |

|                                                                |          |                |       |      |
|----------------------------------------------------------------|----------|----------------|-------|------|
| Matrix metalloproteinase-7 (MMP7)                              | CVD      | 5.5 (1.2-8.4)  | 2.4   | 5    |
| Melanoma-derived growth regulatory protein (MIA)               | Onco     | 4.1 (0.5-5.9)  | 0.98  | 1    |
| Melusin (ITGB1BP2)                                             | CVD      | 4.2 (1.3-8.7)  | 2.6   | 169  |
| Membrane-bound aminopeptidase P (mAmP)                         | CVD      | 2.3 (0.8-5.3)  | 1.5   | 1011 |
| MHC class I polypeptide-related sequence A (MICA)              | Onco     | 2.8 (0.2-5.4)  | 0.35  | 499  |
| Midkine (MK)                                                   | Onco     | 6.3 (2.4-9.9)  | 0.71  | NA   |
| Monocyte chemotactic protein 1 (MCP1)                          | CVD/Onco | 2.5 (0.5-6.5)  | 0.2   | NA   |
| Myeloid differentiation primary response protein MyD88 (MYD88) | Onco     | 1.1 (0.3-4.5)  | 0.6   | 1046 |
| Myeloperoxidase (MPO)                                          | CVD      | 3.5 (0.6-4.8)  | 1.2   | 2    |
| Myoglobin (MB)                                                 | CVD      | 5.4 (3.1-8.1)  | 2.5   | NA   |
| N-terminal pro-B-type natriuretic peptide (NTproBNP)           | CVD      | 3.2 (1.1-7.3)  | 2.2   | 746  |
| NF-kappa-B essential modulator (NEMO)                          | CVD/Onco | 5.0 (1.0-8.3)  | 2.0   | 2    |
| NT-3 growth factor receptor (NTRK3)                            | Onco     | 6.4 (4.2-7.7)  | 0.81  | NA   |
| Osteoprotegerin (OPG)                                          | CVD      | 9.3 (6.8-11.3) | 0.8   | NA   |
| Ovarian cancer-related tumor marker CA 125 (CA125)             | CVD/Onco | 3.7 (1.4-7.3)  | 2.7   | 369  |
| P-selectin glycoprotein ligand 1 (PSGL1)                       | CVD      | 0.5 (0.2-1.7)  | 0.3   | 1012 |
| Pappalysin-1 (PAPPA)                                           | CVD      | 1.8 (0.5-5.2)  | 0.9   | 198  |
| Parkinson protein 7 (PARK7)                                    | Onco     | 7.5 (0.2-8.5)  | 0.38  | 1    |
| Pentraxin-related protein PTX3 (PTX3)                          | CVD      | 1.2 (0.3-3.9)  | 0.5   | 245  |
| Placenta growth factor (PIGF)                                  | CVD/Onco | 7 (4.6-9.1)    | 1.2   | NA   |
| Platelet endothelial cell adhesion molecule (PECAM1)           | CVD/Onco | 6.3 (4.2-8.3)  | 2.0   | NA   |
| Platelet-derived growth factor subunit B (PDGFsubunitB)        | CVD/Onco | 9.0 (5.4-11.2) | 2.4   | NA   |
| Prolactin (PRL)                                                | CVD/Onco | 4.1 (0.7-7.5)  | 1.3   | 2    |
| Prostasin (PRSS8)                                              | Onco     | 8.3 (1.1-9.9)  | 2.27  | 1    |
| Proteinase-activated receptor 1 (PAR1)                         | CVD      | 8.2 (5.9-9.6)  | 2.7   | NA   |
| Proto-oncogene tyrosine-protein kinase Src (SRC)               | CVD      | 7.6 (4.0-9.9)  | 1.0   | NA   |
| Receptor for advanced glycosylation end products (RAGE)        | CVD      | 4.3 (1.6-6.3)  | 0.2   | NA   |
| Receptor tyrosine-protein kinase erbB-2 (ErbB2HER2)            | Onco     | 7.9 (0.5-9.4)  | 1.07  | 1    |
| Receptor tyrosine-protein kinase erbB-3 (ErbB3HER3)            | Onco     | 7.8 (5.7-9.0)  | 0.56  | NA   |
| Receptor tyrosine-protein kinase erbB-4 (ErbB4HER4)            | Onco     | 4.7 (2.7-6.4)  | -0.22 | NA   |
| Regenerating islet-derived protein 4 (REG4)                    | Onco     | 3.2 (0.7-5.5)  | 0.36  | NA   |
| Renin (REN)                                                    | CVD      | 6.5 (3.5-9.7)  | 1.5   | NA   |
| Resistin (RETN)                                                | CVD      | 6.0 (3.4-10.1) | 1.6   | NA   |
| SIR2-like protein-2 (SIRT2)                                    | CVD      | 4.7 (0.5-8.4)  | 0.9   | 3    |
| Spondin-1 (SPON1)                                              | CVD      | 4.3 (1.9-6.6)  | 1.5   | NA   |
| ST2 protein (ST2)                                              | CVD      | 2.7 (0.3 (5.5) | 0.6   | 4    |
| Stem cell factor (SCF)                                         | CVD/Onco | 6.8 (4.1-8.1)  | 0.0   | NA   |
| Tartrate-resistant acid phosphatase type 5 (TRAP)              | Onco     | 5.2 (2.4-7.5)  | 0.27  | NA   |
| Thrombomodulin (TM)                                            | CVD      | 9.3 (6.7-10.9) | 2.1   | NA   |

|                                                               |          |                 |      |      |
|---------------------------------------------------------------|----------|-----------------|------|------|
| Thrombopoietin (THPO)                                         | Onco     | 1.7 (0.6-5.8)   | 1.27 | 770  |
| Tissue injury molecule-1/KIM-1 (TIM)                          | CVD      | 5.1 (1.1-9.6)   | 2.1  | 3    |
| Tissue factor (TF)                                            | CVD/Onco | 5.6 (3.4-8.0)   | 0.9  | NA   |
| Tissue-type plasminogen activator (tPA)                       | CVD      | 5.3 (2.4-8.8)   | 1.5  | NA   |
| TNF-related activation-induced cytokine (TRANCE)              | CVD      | 3.9 (1.2-6.2)   | 2.3  | 38   |
| TNF-related apoptosis-inducing ligand (TRAIL)                 | CVD      | 8.3 (5.9-10.7)  | 1.4  | NA   |
| TNF-related apoptosis-inducing ligand receptor 2 (TRAILR2)    | CVD/Onco | 1.3 (-0.3-8.9)  | -0.3 | NA   |
| Transforming growth factor alpha (TGFalpha)                   | Onco     | 1.3 (0.1-4.2)   | 0.17 | 3    |
| Tumor necrosis factor ligand superfamily member 14 (TNFSF14)  | CVD/Onco | 2.2 (0.1-5.3)   | 0.2  | 2    |
| Tumor necrosis factor receptor 1 (TNFR1)                      | CVD/Onco | 12.2 (9.7-14.1) | 1.7  | NA   |
| Tumor necrosis factor receptor 2 (TNFR2)                      | CVD/Onco | 4.9 (2.3-7.0)   | -0.1 | NA   |
| Tumor necrosis factor receptor superfamily member 4 (TNFRSF4) | Onco     | 2.0 (0.5-5.9)   | 0.2  | NA   |
| Tumor necrosis factor receptor superfamily member 5 (CD40)    | CVD      | 9.4 (7.5-12.2)  | 1.4  | NA   |
| Tumor necrosis factor receptor superfamily member 6 (FAS)     | CVD/Onco | 7.3 (4.9-11.2)  | 0.9  | NA   |
| Tyrosine-protein kinase Lyn (LYN)                             | Onco     | 2.5 (0.2-4.2)   | 0.33 | 17   |
| Tyrosine-protein phosphatase, non-receptor type 22 (PTPN22)   | Onco     | 1.4 (0.6-5.4)   | 1.15 | 1336 |
| Urokinase plasminogen activator surface receptor (UPAR)       | CVD/Onco | 9.5 (7.5-11.3)  | 1.3  | NA   |
| Vascular endothelial growth factor A (VEGFA)                  | CVD/Onco | 10.0 (7.5-12.6) | 1.1  | NA   |
| Vascular endothelial growth factor D (VEGFD)                  | CVD/Onco | 6.7 (0.7-8.5)   | 1.3  | 2    |
| Vascular endothelial growth factor receptor 2 (VEGFR2)        | Onco     | 6.8 (4.4-8.0)   | 0.46 | NA   |
| Vimentin (VIM)                                                | Onco     | 2.8 (0.4-6.5)   | 0.07 | NA   |

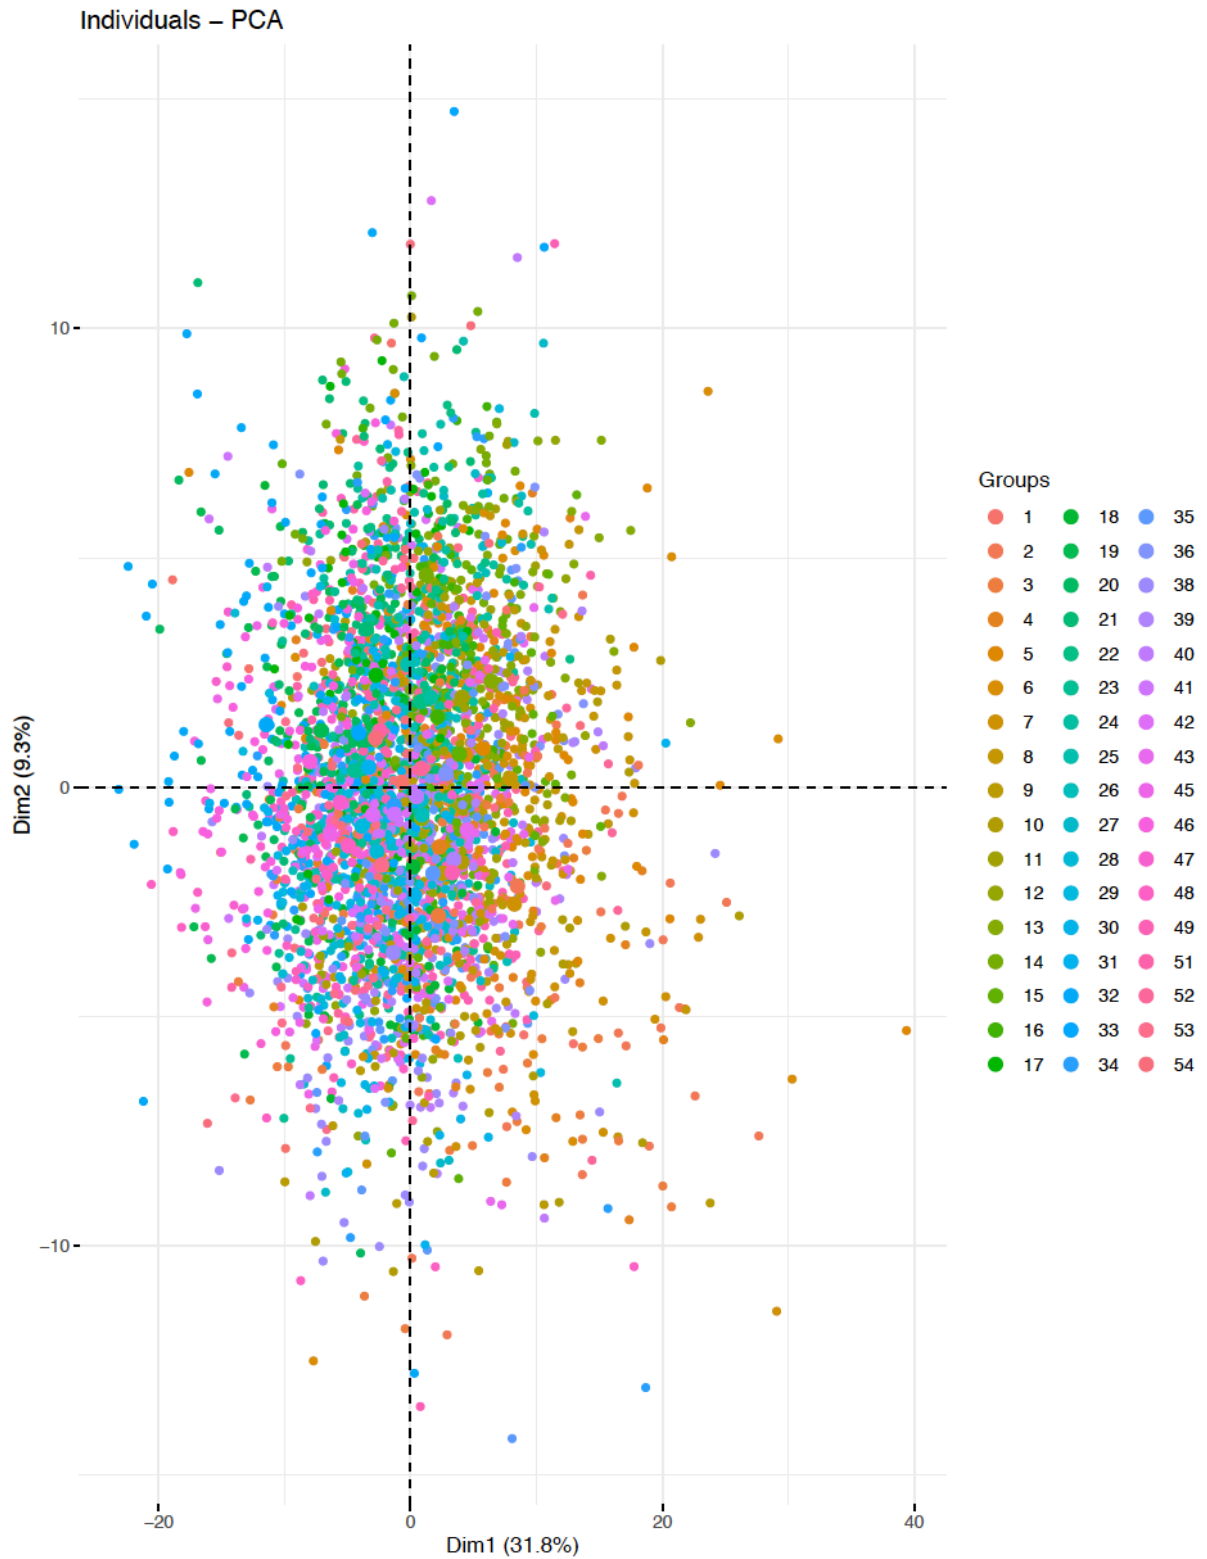

**Supplement Figure 2.** Principal components analysis (PCA) of 138 age-standardized plasma proteins in the MDCS-CVA (N=3,918). The first two principal components were plotted with each sample (i.e. individual) colored by batch group (i.e. plate).

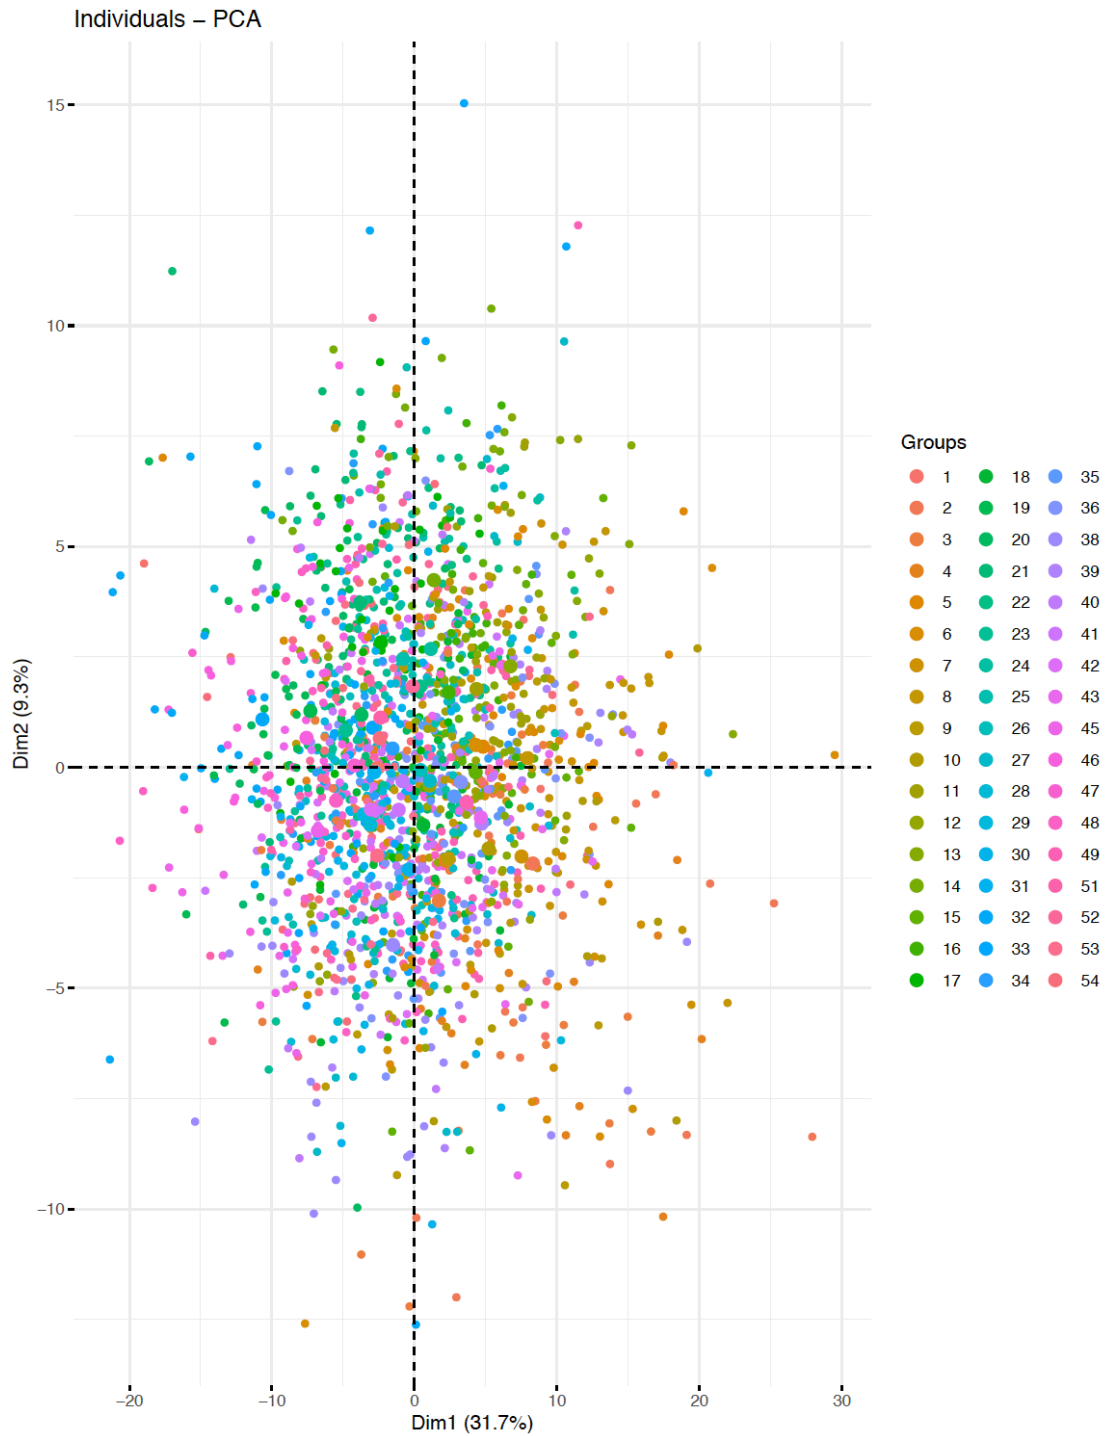

**Supplement Figure 3.** Principal components analysis (PCA) of 138 age-standardized plasma proteins in the MDCS-CVA random sample 1 (N=1,963). The first two principal components were plotted with each sample (i.e. individual) colored by batch group (i.e. plate).



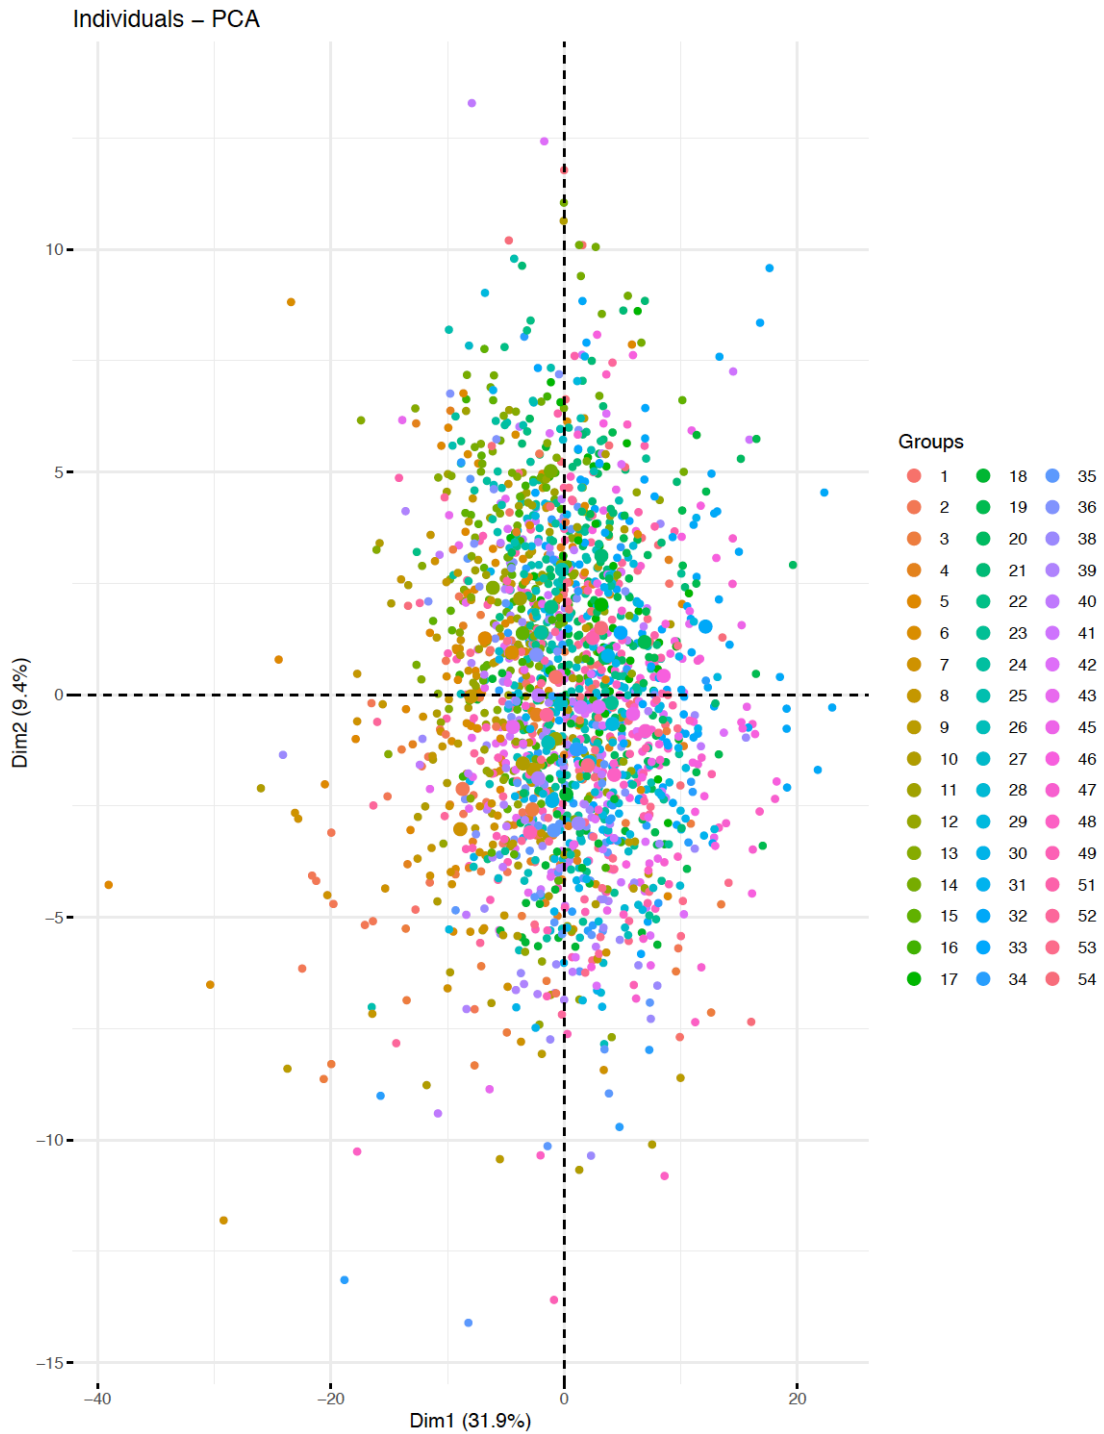

**Supplement Figure 4.** Principal components analysis (PCA) of 138 age-standardized plasma proteins in the MDCS-CVA random sample 2 (N=1,955). The first two principal components were plotted with each sample (i.e. individual) colored by batch group (i.e. plate).

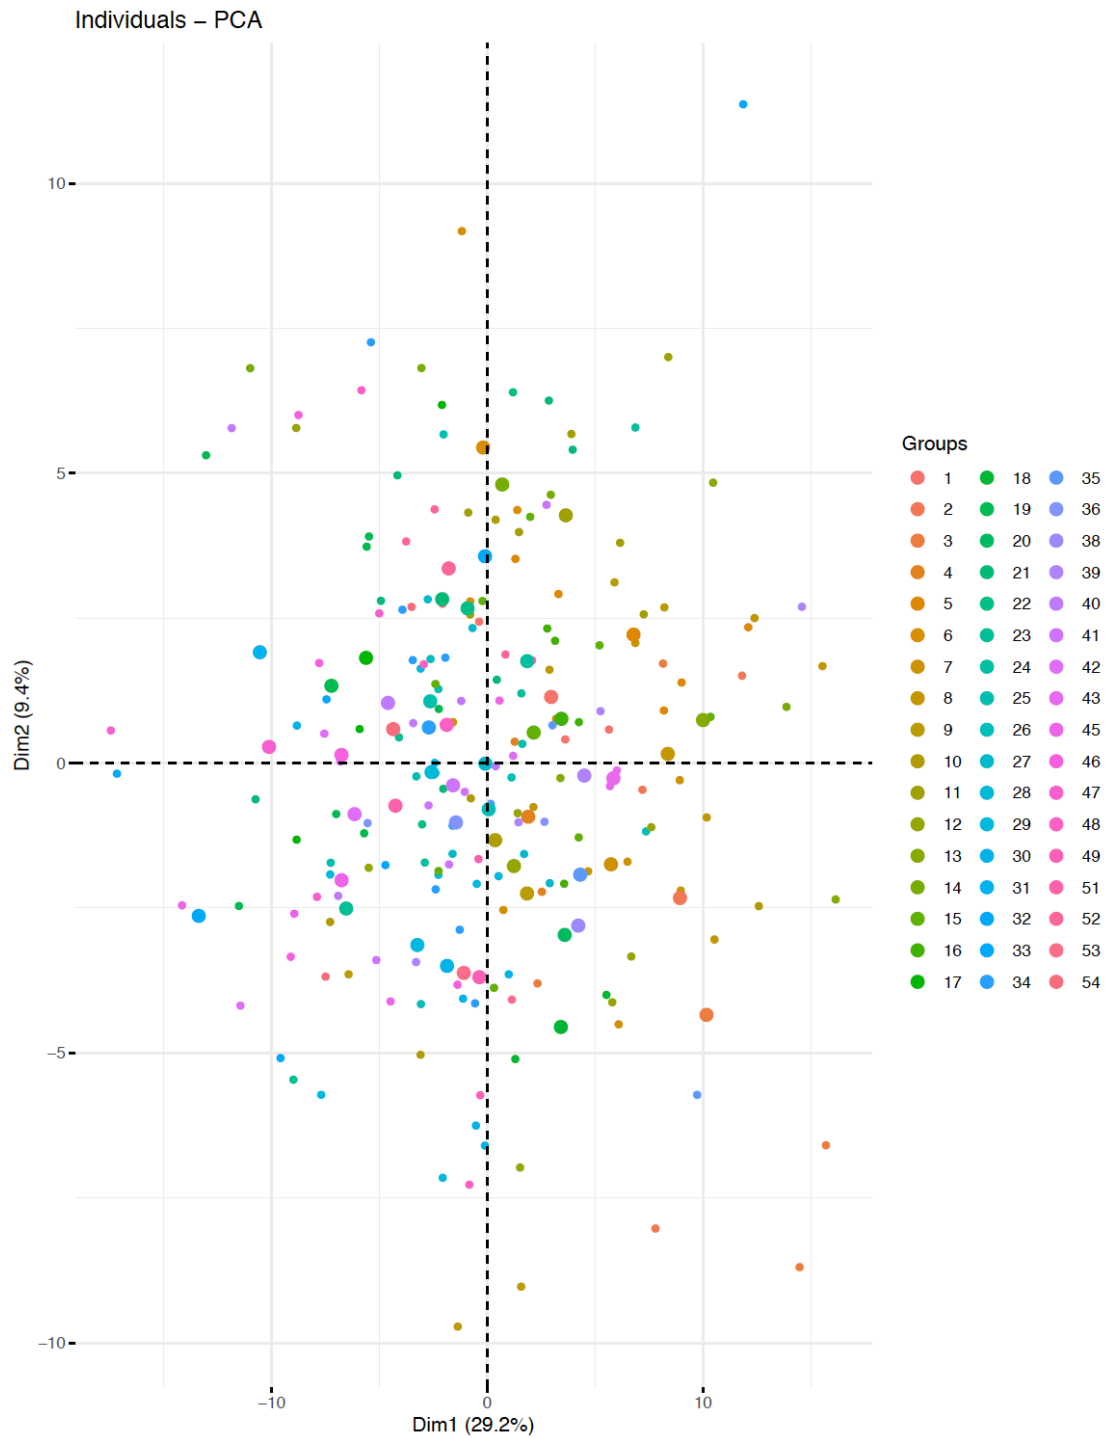

**Supplement Figure 5.** Principal components analysis (PCA) of 138 age-standardized plasma proteins in the MDCS-CVA in a smaller random sample (N=200). The first two principal components were plotted with each sample (i.e. individual) colored by batch group (i.e. plate).

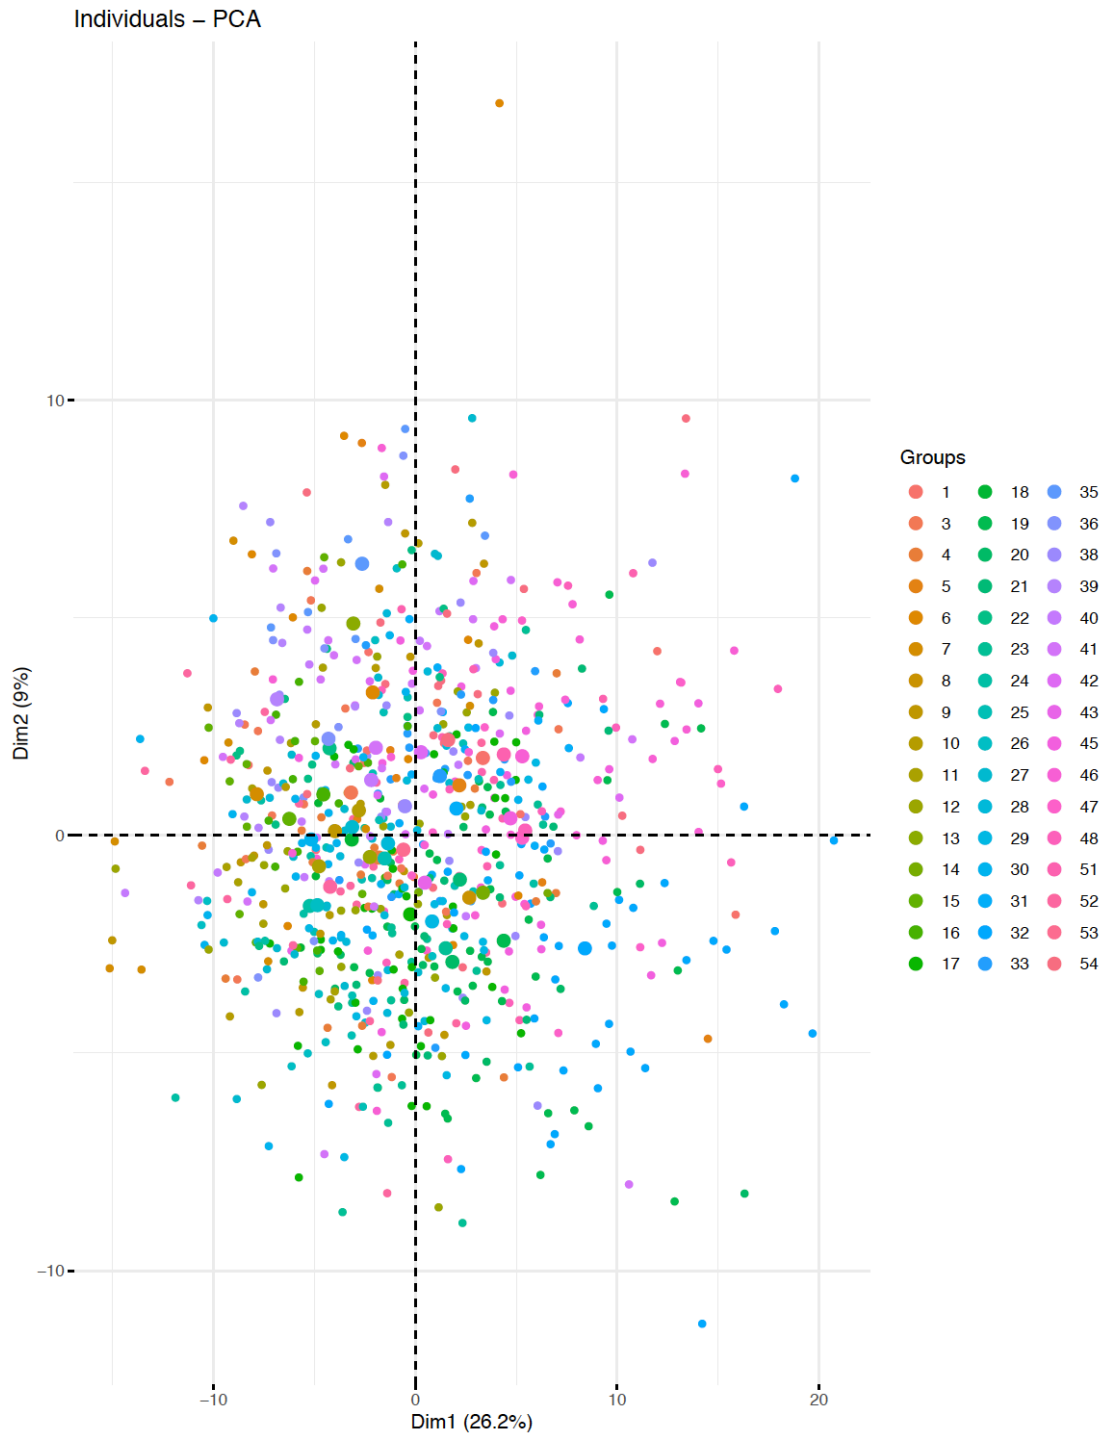

**Supplement Figure 6.** Principal components analysis (PCA) of 138 age-standardized plasma proteins in the MDCS-CVA among subjects with no imputed protein levels (N=772). The first two principal components were plotted with each sample (i.e. individual) colored by batch group (i.e. plate).

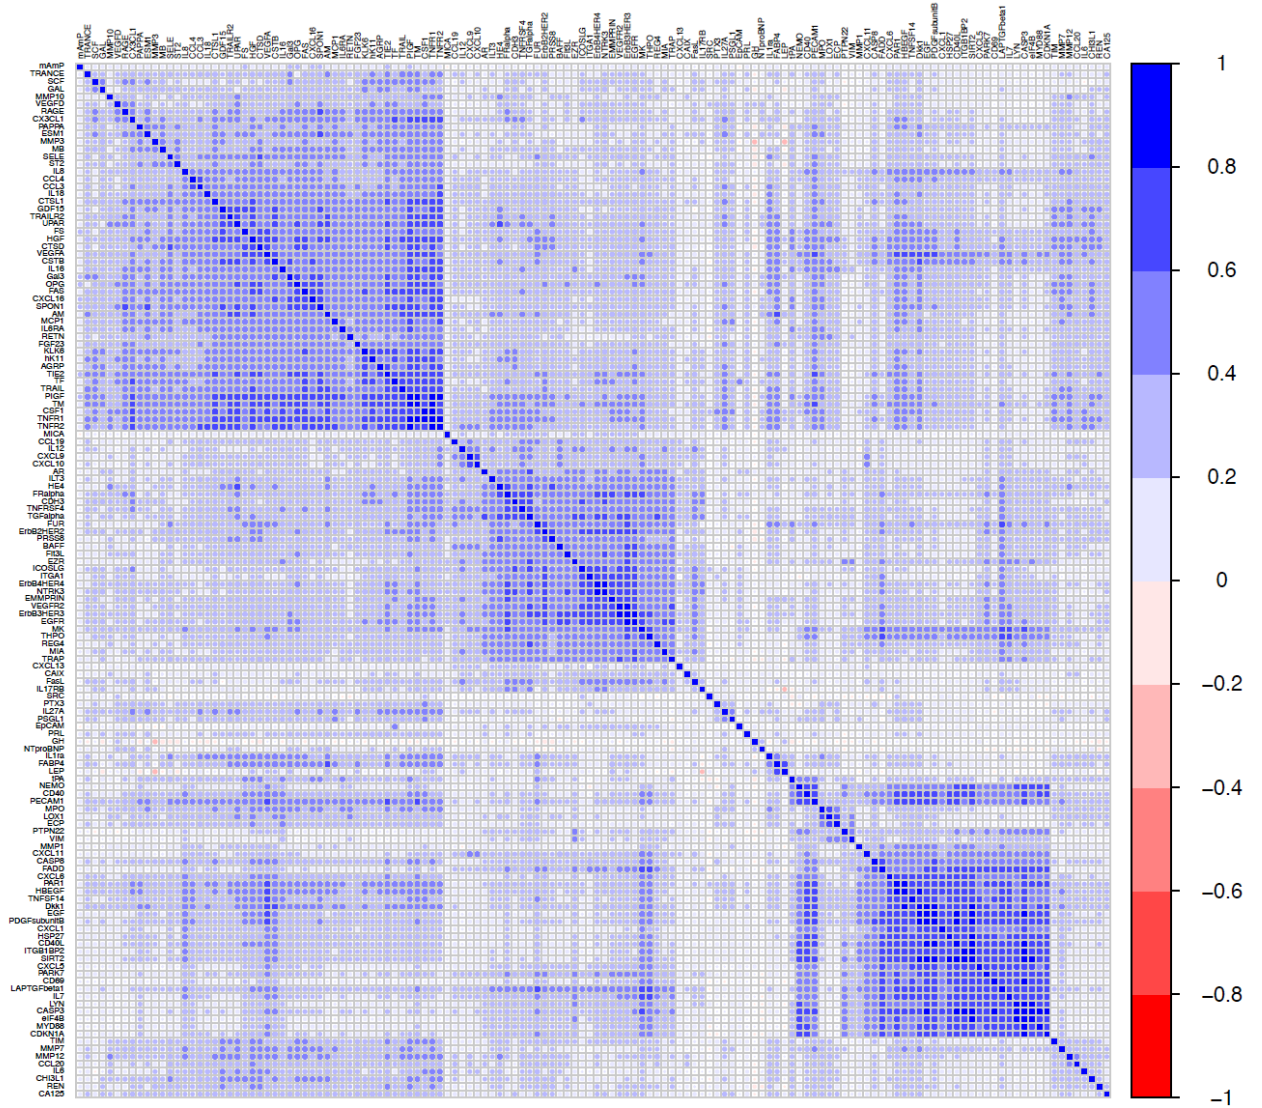

**Supplement Figure 7.** Heat map of Pearson correlation coefficients for 138 age-standardized plasma proteins levels measured in 3,918 subjects from the MDCS-CVA.

**Supplement Table 2.** Univariable and multivariable hazard ratios (HRs) and 95% confidence intervals (CI) per standard deviation (SD) of 138 proteins in relation to all-cause mortality in the MDCS-CVA (n=3,918). Multivariable analysis adjusted for age, sex, smoking status, BMI, educational level, history of hypertension, prevalent diabetes mellitus, C-reactive protein (ln-transformed), HbA1c (ln-transformed), and LDL-cholesterol.

| Protein name (abbreviation)                   | Panel    | Univariable      | P-value  | Multivariable    | P-value  |
|-----------------------------------------------|----------|------------------|----------|------------------|----------|
| Adrenomedullin (AM)                           | CVD/Onco | 1.09 (1.02-1.16) | 0.012    | 1.01 (0.95-1.09) | 0.678    |
| Agouti-related protein (AGRP)                 | CVD      | 1.02 (0.96-1.08) | 0.563    | 1.00 (0.94-1.07) | 0.998    |
| Amphiregulin (AR)                             | Onco     | 1.14 (1.08-1.20) | 2.00E-06 | 1.13 (1.07-1.20) | 3.60E-05 |
| Angiotensin-1 receptor (TIE2)                 | CVD/Onco | 1.03 (0.97-1.10) | 0.328    | 0.96 (0.90-1.03) | 0.246    |
| B-cell activating factor (BAFF)               | Onco     | 1.07 (1.00-1.14) | 0.036    | 1.01 (0.95-1.08) | 0.688    |
| C-C motif chemokine 19 (CCL19)                | Onco     | 1.14 (1.08-1.21) | 1.40E-05 | 1.09 (1.02-1.16) | 7.70E-03 |
| C-C motif chemokine 20 (CCL20)                | CVD      | 1.14 (1.08-1.21) | 6.60E-06 | 1.06 (1.00-1.13) | 0.066    |
| C-C motif chemokine 3 (CCL3)                  | CVD      | 1.11 (1.05-1.17) | 3.00E-04 | 1.05 (0.99-1.12) | 0.112    |
| C-C motif chemokine 4 (CCL4)                  | CVD      | 1.06 (0.99-1.12) | 0.079    | 0.98 (0.92-1.05) | 0.643    |
| C-X-C motif chemokine 1 (CXCL1)               | CVD      | 1.06 (0.99-1.13) | 0.094    | 0.99 (0.93-1.06) | 0.874    |
| C-X-C motif chemokine 10 (CXCL10)             | Onco     | 1.05 (0.99-1.12) | 0.092    | 1.09 (1.02-1.16) | 0.012    |
| C-X-C motif chemokine 11 (CXCL11)             | Onco     | 1.06 (1.00-1.13) | 0.053    | 1.09 (1.02-1.16) | 7.20E-03 |
| C-X-C motif chemokine 13 (CXCL13)             | Onco     | 1.10 (1.02-1.18) | 0.019    | 1.08 (1.01-1.16) | 0.024    |
| C-X-C motif chemokine 5 (CXCL5)               | Onco     | 1.01 (0.95-1.08) | 0.715    | 0.97 (0.91-1.04) | 0.419    |
| C-X-C motif chemokine 6 (CXCL6)               | CVD      | 0.98 (0.92-1.05) | 0.616    | 0.94 (0.88-1.00) | 0.071    |
| C-X-C motif chemokine 9 (CXCL9)               | Onco     | 1.10 (1.04-1.17) | 1.70E-03 | 1.13 (1.07-1.21) | 8.90E-05 |
| C-X-C motif chemokine-16 8CXCL16)             | CVD      | 1.06 (1.00-1.13) | 0.057    | 1.01 (0.95-1.07) | 0.803    |
| Cadherin-3 (CDH3)                             | Onco     | 0.98 (0.92-1.04) | 0.527    | 0.97 (0.91-1.04) | 0.419    |
| Carbonic anhydrase IX (CAIX)                  | Onco     | 1.03 (0.97-1.09) | 0.401    | 1.03 (0.97-1.10) | 0.303    |
| Caspase-3 (CASP3)                             | Onco     | 1.08 (1.01-1.15) | 0.019    | 1.01 (0.94-1.07) | 0.865    |
| Caspase-8 (CASP8)                             | CVD      | 1.11 (1.04-1.18) | 1.20E-03 | 1.02 (0.96-1.08) | 0.593    |
| Cathepsin D (CTSD)                            | CVD      | 1.23 (1.15-1.31) | 1.70E-10 | 1.04 (0.97-1.11) | 0.32     |
| Cathepsin L1 (CTSL1)                          | CVD      | 1.17 (1.10-1.25) | 1.1E-06  | 1.05 (0.98-1.12) | 0.14     |
| CD40 ligand (CD40L)                           | CVD/Onco | 1.02 (0.96-1.09) | 0.56     | 0.96 (0.90-1.02) | 0.182    |
| Chitinase-3-like protein (CH3L1)              | CVD      | 1.20 (1.12-1.27) | 1.40E-08 | 1.07 (1.00-1.13) | 0.041    |
| Cyclin-dependent kinase inhibitor 1A (CDKN1A) | Onco     | 1.06 (1.00-1.13) | 0.062    | 0.98 (0.92-1.05) | 0.612    |
| Cystatin-B (CSTB)                             | CVD/Onco | 1.17 (1.10-1.25) | 1.00E-06 | 1.07 (1.00-1.14) | 0.52     |
| Dickkopf-related protein-1 (Dkk1)             | CVD      | 0.99 (0.93-1.06) | 0.782    | 0.95 (0.89-1.01) | 0.125    |
| E-selectin (SELE)                             | CVD/Onco | 1.11 (1.05-1.19) | 7.30E-04 | 0.98 (0.91-1.05) | 0.496    |
| Early activation antigen CD69 (CD60)          | Onco     | 1.08 (1.02-1.16) | 0.014    | 1.03 (0.96-1.10) | 0.42     |
| Endothelial cell-specific molecule 1 (ESM1)   | CVD      | 0.92 (0.86-0.98) | 9.50E-03 | 0.98 (0.92-1.04) | 0.463    |
| Eosinophil cationic protein (ECP)             | CVD      | 1.06 (0.99-1.12) | 0.085    | 1.01 (0.94-1.08) | 0.823    |
| Epidermal growth factor (EGF)                 | CVD      | 1.04 (0.97-1.11) | 0.253    | 0.98 (0.92-1.04) | 0.462    |
| Epidermal growth factor receptor (EGFR)       | Onco     | 0.92 (0.87-0.98) | 0.011    | 0.89 (0.84-0.95) | 4.90E-04 |

|                                                                            |          |                  |          |                  |          |
|----------------------------------------------------------------------------|----------|------------------|----------|------------------|----------|
| Epididymal secretory protein E4 (HE4)                                      | Onco     | 1.35 (1.26-1.44) | 6.60E-20 | 1.18 (1.09-1.27) | 1.30E-05 |
| Epithelial cell adhesion molecule (EpCAM)                                  | Onco     | 0.99 (0.93-1.05) | 0.711    | 1.02 (0.95-1.09) | 0.571    |
| Eukaryotic translation initiation factor 4B (eIF4B)                        | Onco     | 1.02 (0.96-1.09) | 0.407    | 0.98 (0.92-1.04) | 0.503    |
| Extracellular matrix metalloproteinase inducer (EMMPRIN)                   | Onco     | 0.95 (0.89-1.00) | 0.065    | 0.97 (0.92-1.03) | 0.326    |
| Ezrin (EZR)                                                                | Onco     | 1.00 (0.94-1.07) | 0.884    | 0.97 (0.91-1.03) | 0.319    |
| Fas antigen ligand (FasL)                                                  | Onco     | 0.82 (0.77-0.88) | 2.00E-09 | 0.92 (0.86-0.98) | 0.012    |
| FAS-associated death domain protein (FADD)                                 | Onco     | 1.10 (1.03-1.17) | 2.50E-03 | 1.03 (0.97-1.10) | 0.373    |
| Fatty acid-binding protein, adipocyte (FABP4)                              | CVD      | 0.96 (0.90-1.02) | 0.166    | 0.97 (0.90-1.05) | 0.478    |
| Fibroblast growth factor 23 (FGF23)                                        | CVD      | 1.12 (1.05-1.19) | 3.30E-04 | 1.07 (1.00-1.14) | 0.039    |
| Fms-related tyrosine kinase 3 ligand (Flt3L)                               | Onco     | 1.04 (0.97-1.11) | 0.272    | 1.00 (0.94-1.07) | 0.973    |
| Folate receptor alpha (FRalpha)                                            | Onco     | 1.03 (0.96-1.09) | 0.435    | 1.02 (0.96-1.09) | 0.484    |
| Follistatin (FS)                                                           | CVD/Onco | 1.10 (1.04-1.17) | 1.90E-03 | 0.97 (0.91-1.04) | 0.454    |
| Fractalkine (CX3CL1)                                                       | CVD      | 1.02 (0.96-1.09) | 0.559    | 1.06 (0.99-1.12) | 0.198    |
| Furin (FUR)                                                                | Onco     | 1.14 (1.07-1.21) | 5.50E-05 | 1.03 (0.95-1.11) | 0.479    |
| Galanin peptides (GAL)                                                     | CVD      | 0.94 (0.88-1.00) | 0.049    | 0.92 (0.86-0.98) | 0.013    |
| Galectin-3 (Gal3)                                                          | CVD      | 0.93 (0.87-0.99) | 0.026    | 0.95 (0.89-1.01) | 0.111    |
| Growth hormone (GH)                                                        | CVD/Onco | 0.96 (0.90-1.02) | 0.17     | 1.16 (1.08-1.26) | 1.80E-04 |
| Growth/differentiation factor 15 (GDF15)                                   | CVD/Onco | 1.42 (1.34-1.51) | 2.40E-30 | 1.24 (1.16-1.33) | 3.80E-10 |
| Heat shock 27 kDa protein (HSP27)                                          | CVD      | 0.99 (0.93-1.05) | 0.645    | 0.96 (0.90-1.02) | 0.158    |
| Heparin-binding EGF-like growth factor (HBEGF)                             | CVD/Onco | 1.01 (0.95-1.07) | 0.798    | 0.96 (0.90-1.02) | 0.196    |
| Hepatocyte growth factor (HGF)                                             | CVD/Onco | 1.26 (1.18-1.34) | 1.50E-12 | 1.08 (1.01-1.16) | 0.31     |
| ICOS ligand (ICOSLG)                                                       | Onco     | 0.92 (0.87-0.98) | 0.013    | 0.94 (0.88-1.00) | 0.04     |
| Immunoglobulin-like transcript 3 (ILT3)                                    | Onco     | 1.10 (1.04-1.17) | 1.90E-03 | 1.05 (0.99-1.12) | 0.095    |
| Integrin alpha-1 (ITGA1)                                                   | Onco     | 0.98 (0.92-1.04) | 0.497    | 1.00 (0.94-1.07) | 0.997    |
| Interleukin-1 receptor antagonist protein (IL1ra)                          | CVD/Onco | 1.12 (1.05-1.19) | 9.00E-04 | 1.03 (0.96-1.11) | 0.426    |
| Interleukin-12 (IL12)                                                      | Onco     | 0.99 (0.93-1.06) | 0.87     | 1.08 (1.01-1.16) | 0.021    |
| Interleukin-16 (IL16)                                                      | CVD      | 1.03 (0.96-1.09) | 0.425    | 0.96 (0.90-1.03) | 0.241    |
| Interleukin-17 receptor B (IL17RB)                                         | Onco     | 0.99 (0.93-1.06) | 0.77     | 0.98 (0.92-1.04) | 0.499    |
| Interleukin-18 (IL18)                                                      | CVD      | 1.13 (1.06-1.20) | 1.00E-04 | 0.98 (0.92-1.05) | 0.644    |
| Interleukin-27 subunit alpha (IL27A)                                       | CVD      | 1.01 (0.94-1.07) | 0.837    | 1.04 (0.98-1.11) | 0.2      |
| Interleukin-6 (IL6)                                                        | CVD/Onco | 1.23 (1.17-1.30) | 2.40E-15 | 1.13 (1.05-1.20) | 3.90E-04 |
| Interleukin-6 receptor subunit alpha (IL6RA)                               | CVD/Onco | 1.06 (0.99-1.13) | 0.083    | 1.02 (0.96-1.09) | 0.544    |
| Interleukin-7 (IL7)                                                        | Onco     | 1.04 (0.98-1.11) | 0.177    | 0.99 (0.93-1.06) | 0.795    |
| Interleukin-8 (IL8)                                                        | CVD/Onco | 1.12 (1.06-1.19) | 7.50E-05 | 1.06 (1.00-1.12) | 0.071    |
| Kallikrein-11 (hK11)                                                       | CVD/Onco | 1.01 (0.95-1.08) | 0.758    | 0.97 (0.91-1.03) | 0.346    |
| Kallikrein-6 (KLK6)                                                        | CVD/Onco | 0.96 (0.90-1.02) | 0.157    | 0.94 (0.88-1.00) | 0.059    |
| Latency-associated peptide transforming growth factor beta-1 (LAPTGFbeta1) | Onco     | 1.09 (1.02-1.16) | 7.40E-03 | 1.02 (0.95-1.08) | 0.64     |
| Lectin-like oxidized LDL receptor (LOX1)                                   | CVD      | 1.20 (1.13-1.28) | 1.00E-09 | 1.11 (1.04-1.18) | 2.20E-03 |
| Leptin (LEP)                                                               | CVD      | 0.88 (0.83-0.94) | 7.30E-05 | 0.95 (0.85-1.05) | 0.305    |

|                                                                |          |                   |          |                  |          |
|----------------------------------------------------------------|----------|-------------------|----------|------------------|----------|
| Macrophage colony-stimulating factor-1 (CSF1)                  | CVD/Onco | 1.11 (1.04-1.18)  | 1.40E-03 | 1.04 (0.97-1.11) | 0.264    |
| Matrix metalloproteinase-1 (MMP1)                              | CVD/Onco | 1.15 (1.008-1.22) | 1.60E-05 | 1.08 (1.01-1.15) | 0.021    |
| Matrix metalloproteinase-10 (MMP10)                            | CVD      | 1.06 (1.00-1.13)  | 0.05     | 0.99 (0.92-1.05) | 0.686    |
| Matrix metalloproteinase-12 (MMP12)                            | CVD      | 1.27 (1.19-1.35)  | 9.80E-14 | 1.10 (1.02-1.17) | 8.90E-03 |
| Matrix metalloproteinase-3 (MMP3)                              | CVD      | 1.21 (1.14-1.29)  | 1.30E-09 | 1.06 (0.99-1.15) | 0.105    |
| Matrix metalloproteinase-7 (MMP7)                              | CVD      | 1.15 (1.08-1.23)  | 3.20E-05 | 1.08 (1.01-1.16) | 0.025    |
| Melanoma-derived growth regulatory protein (MIA)               | Onco     | 0.99 (0.93-1.05)  | 0.727    | 0.99 (0.93-1.06) | 0.788    |
| Melusin (ITGB1BP2)                                             | CVD      | 1.06 (0.99-1.13)  | 0.081    | 1.00 (0.94-1.07) | 0.904    |
| Membrane-bound aminopeptidase P (mAmP)                         | CVD      | 0.98 (0.93-1.05)  | 0.635    | 0.99 (0.93-1.06) | 0.846    |
| MHC class I polypeptide-related sequence A (MICA)              | Onco     | 0.98 (0.92-1.04)  | 0.547    | 0.96 (0.90-1.02) | 0.203    |
| Midkine (MK)                                                   | Onco     | 1.11 (1.04-1.18)  | 2.10E-03 | 1.05 (0.99-1.13) | 0.124    |
| Monocyte chemotactic protein 1 (MCP1)                          | CVD/Onco | 1.04 (0.98-1.11)  | 0.168    | 1.00 (0.93-1.06) | 0.933    |
| Myeloid differentiation primary response protein MyD88 (MYD88) | Onco     | 1.03 (0.97-1.10)  | 0.287    | 0.99 (0.93-1.05) | 0.703    |
| Myeloperoxidase (MPO)                                          | CVD      | 1.09 (1.02-1.16)  | 0.01     | 1.03 (0.96-1.10) | 0.395    |
| Myoglobin (MB)                                                 | CVD      | 0.99 (0.93-1.05)  | 0.702    | 0.91 (0.85-0.98) | 8.30E-03 |
| N-terminal pro-B-type natriuretic peptide (NTproBNP)           | CVD      | 1.06 (0.99-1.13)  | 0.084    | 1.15 (1.08-1.23) | 1.90E-05 |
| NF-kappa-B essential modulator (NEMO)                          | CVD/Onco | 1.00 (0.94-1.07)  | 0.882    | 0.96 (0.90-1.03) | 0.245    |
| NT-3 growth factor receptor (NTRK3)                            | Onco     | 0.92 (0.86-0.98)  | 8.90E-03 | 0.95 (0.89-1.01) | 0.103    |
| Osteoprotegerin (OPG)                                          | CVD      | 1.11 (1.04-1.18)  | 1.60E-03 | 1.04 (0.98-1.11) | 0.208    |
| Ovarian cancer-related tumor marker CA 125 (CA125)             | CVD/Onco | 1.08 (1.01-1.15)  | 0.022    | 1.03 (0.97-1.10) | 0.365    |
| P-selectin glycoprotein ligand 1 (PSGL1)                       | CVD      | 0.99 (0.93-1.05)  | 0.727    | 0.98 (0.92-1.04) | 0.513    |
| Pappalysin-1 (PAPPA)                                           | CVD      | 1.08 (1.01-1.15)  | 0.023    | 1.02 (0.95-1.09) | 0.651    |
| Parkinson protein 7 (PARK7)                                    | Onco     | 1.05 (0.99-1.13)  | 0.113    | 1.00 (0.94-1.06) | 0.877    |
| Pentraxin-related protein PTX3 (PTX3)                          | CVD      | 1.04 (0.98-1.11)  | 0.206    | 1.02 (0.96-1.09) | 0.513    |
| Placenta growth factor (PLGF)                                  | CVD/Onco | 1.16 (1.08-1.23)  | 1.10E-05 | 1.03 (0.97-1.11) | 0.317    |
| Platelet endothelial cell adhesion molecule (PECAM1)           | CVD/Onco | 1.04 (0.97-1.10)  | 0.257    | 0.97 (0.91-1.03) | 0.33     |
| Platelet-derived growth factor subunit B (PDGFsubunitB)        | CVD/Onco | 1.07 (1.00-1.14)  | 0.041    | 0.98 (0.92-1.05) | 0.604    |
| Prolactin (PRL)                                                | CVD/Onco | 0.95 (0.90-1.02)  | 0.145    | 1.00 (0.94-1.07) | 0.918    |
| Prostasin (PRSS8)                                              | Onco     | 1.32 (1.23-1.41)  | 1.00E-15 | 1.11 (1.03-1.19) | 7.00E-03 |
| Proteinase-activated receptor 1 (PAR1)                         | CVD      | 1.01 (0.95-1.08)  | 0.667    | 0.96 (0.90-1.02) | 0.169    |
| Proto-oncogene tyrosine-protein kinase Src (SRC)               | CVD      | 0.95 (0.89-1.01)  | 0.073    | 0.95 (0.90-1.01) | 0.121    |
| Receptor for advanced glycosylation end products (RAGE)        | CVD      | 0.88 (0.83-0.94)  | 1.20E-04 | 0.93 (0.88-1.00) | 0.035    |
| Receptor tyrosine-protein kinase erbB-2 (ErbB2HER2)            | Onco     | 1.08 (1.02-1.16)  | 0.016    | 0.97 (0.91-1.03) | 0.368    |
| Receptor tyrosine-protein kinase erbB-3 (ErbB3HER3)            | Onco     | 0.97 (0.91-1.03)  | 0.328    | 0.95 (0.89-1.02) | 0.152    |
| Receptor tyrosine-protein kinase erbB-4 (ErbB4HER4)            | Onco     | 1.01 (0.94-1.07)  | 0.877    | 0.95 (0.89-1.02) | 0.152    |
| Regenerating islet-derived protein 4 (REG4)                    | Onco     | 1.10 (1.03-1.17)  | 3.90E-03 | 1.03 (0.97-1.10) | 0.302    |
| Renin (REN)                                                    | CVD      | 1.22 (1.15-1.30)  | 4.90E-10 | 1.02 (0.96-1.09) | 0.461    |
| Resistin (RETN)                                                | CVD      | 1.09 (1.02-1.16)  | 9.90E-03 | 1.04 (0.97-1.10) | 0.267    |

|                                                               |          |                  |          |                  |          |
|---------------------------------------------------------------|----------|------------------|----------|------------------|----------|
| SIR2-like protein-2 (SIRT2)                                   | CVD      | 1.03 (0.96-1.09) | 0.445    | 0.98 (0.91-1.04) | 0.457    |
| Spondin-1 (SPON1)                                             | CVD      | 1.07 (1.00-1.14) | 0.036    | 1.03 (0.96-1.10) | 0.392    |
| ST2 protein (ST2)                                             | CVD      | 1.15 (1.08-1.22) | 1.50E-05 | 1.07 (1.00-1.15) | 0.055    |
| Stem cell factor (SCF)                                        | CVD/Onco | 0.80 (0.75-0.85) | 2.80E-14 | 0.86 (0.81-0.92) | 6.20E-06 |
| Tartrate-resistant acid phosphatase type 5 (TRAP)             | Onco     | 1.09 (1.03-1.16) | 6.40E-03 | 1.02 (0.96-1.09) | 0.539    |
| Thrombomodulin (TM)                                           | CVD      | 1.05 (0.98-1.12) | 0.142    | 0.97 (0.91-1.03) | 0.323    |
| Thrombopoietin (THPO)                                         | Onco     | 0.99 (0.93-1.06) | 0.78     | 0.95 (0.89-1.02) | 0.153    |
| Tissue injury molecule-1/KIM-1 (TIM)                          | CVD      | 1.26 (1.18-1.34) | 8.00E-13 | 1.13 (1.05-1.20) | 4.40E-04 |
| Tissue factor (TF)                                            | CVD/Onco | 0.99 (0.93-1.05) | 0.712    | 0.97 (0.91-1.04) | 0.399    |
| Tissue-type plasminogen activator (tPA)                       | CVD      | 1.09 (1.02-1.16) | 8.10E-03 | 1.00 (0.94-1.07) | 0.956    |
| TNF-related activation-induced cytokine (TRANCE)              | CVD      | 0.97 (0.91-1.03) | 0.316    | 0.94 (0.88-1.00) | 0.065    |
| TNF-related apoptosis-inducing ligand (TRAIL)                 | CVD      | 1.00 (0.94-1.07) | 0.907    | 0.92 (0.86-0.98) | 0.013    |
| TNF-related apoptosis-inducing ligand receptor 2 (TRAILR2)    | CVD/Onco | 1.14 (1.10-1.18) | 1.50E-11 | 1.07 (1.02-1.13) | 8.40E-03 |
| Transforming growth factor alpha (TGFalpha)                   | Onco     | 1.13 (1.07-1.21) | 7.60E-05 | 1.08 (1.01-1.15) | 0.023    |
| Tumor necrosis factor ligand superfamily member 14 (TNFSF14)  | CVD/Onco | 1.07 (1.01-1.14) | 0.027    | 0.99 (0.93-1.05) | 0.725    |
| Tumor necrosis factor receptor 1 (TNFR1)                      | CVD/Onco | 1.15 (1.07-1.22) | 4.00E-05 | 1.03 (0.96-1.10) | 0.387    |
| Tumor necrosis factor receptor 2 (TNFR2)                      | CVD/Onco | 1.14 (1.07-1.22) | 3.4E-06  | 1.03 (0.97-1.11) | 0.23     |
| Tumor necrosis factor receptor superfamily member 4 (TNFRSF4) | Onco     | 1.09 (1.02-1.16) | 7.30E-03 | 1.04 (0.97-1.11) | 0.253    |
| Tumor necrosis factor receptor superfamily member 5 (CD40)    | CVD      | 1.04 (0.98-1.11) | 0.242    | 0.99 (0.93-1.06) | 0.834    |
| Tumor necrosis factor receptor superfamily member 6 (FAS)     | CVD/Onco | 1.07 (1.01-1.14) | 0.029    | 0.97 (0.91-1.04) | 0.424    |
| Tyrosine-protein kinase Lyn (LYN)                             | Onco     | 1.03 (0.97-1.10) | 0.379    | 0.98 (0.92-1.04) | 0.494    |
| Tyrosine-protein phosphatase, non-receptor type 22 (PTPN22)   | Onco     | 1.10 (1.03-1.17) | 2.20E-03 | 1.03 (0.97-1.10) | 0.299    |
| Urokinase plasminogen activator surface receptor (UPAR)       | CVD/Onco | 1.29 (1.21-1.37) | 6.90E-15 | 1.16 (1.08-1.24) | 4.70E-05 |
| Vascular endothelial growth factor A (VEGFA)                  | CVD/Onco | 1.13 (1.06-1.20) | 7.90E-05 | 1.03 (0.96-1.10) | 0.44     |
| Vascular endothelial growth factor D (VEGFD)                  | CVD/Onco | 1.01 (0.94-1.08) | 0.81     | 0.99 (0.93-1.06) | 0.799    |
| Vascular endothelial growth factor receptor 2 (VEGFR2)        | Onco     | 0.98 (0.92-1.04) | 0.539    | 0.93 (0.87-0.99) | 0.02     |
| Vimentin (VIM)                                                | Onco     | 1.03 (0.97-1.10) | 0.317    | 1.00 (0.94-1.07) | 0.992    |



**Supplement Table 3.** Multivariable hazard ratios (HR) and 95% confidence intervals (CI) per standard deviation (SD) for 138 proteins in relation to all-cause mortality in two random samples of the MDCS-CVA (n=3,918). Multivariable analyses adjusted for age, sex, smoking status, BMI, educational level, history of hypertension, prevalent diabetes mellitus, C-reactive protein (ln-transformed), HbA1c (ln-transformed), and LDL-cholesterol. Proteins with a nominally significant association with all-cause mortality ( $P<0.05$ ) in one (light grey) or both (dark grey) random samples are highlighted.

| Protein name (abbreviation)                   | Panel    | Random sample 1  | P-value  | Random sample 2  | P-value  |
|-----------------------------------------------|----------|------------------|----------|------------------|----------|
| Adrenomedullin (AM)                           | CVD/Onco | 1.10 (1.00-1.21) | 0.063    | 0.93 (0.84-1.02) | 0.131    |
| Agouti-related protein (AGRP)                 | CVD      | 1.03 (0.94-1.13) | 0.581    | 0.97 (0.89-1.07) | 0.585    |
| Amphiregulin (AR)                             | Onco     | 1.14 (1.05-1.23) | 1.00E-03 | 1.13 (1.03-1.24) | 0.011    |
| Angiopoietin-1 receptor (TIE2)                | CVD/Onco | 0.99 (0.90-1.09) | 0.874    | 0.93 (0.84-1.02) | 0.107    |
| B-cell activating factor (BAFF)               | Onco     | 1.04 (0.95-1.14) | 0.385    | 0.97 (0.88-1.07) | 0.575    |
| C-C motif chemokine 19 (CCL19)                | Onco     | 1.04 (0.95-1.14) | 0.400    | 1.14 (1.04-1.25) | 4.60E-03 |
| C-C motif chemokine 20 (CCL20)                | CVD      | 1.07 (0.98-1.17) | 0.147    | 1.05 (0.96-1.15) | 0.302    |
| C-C motif chemokine 3 (CCL3)                  | CVD      | 1.07 (0.97-1.17) | 0.161    | 1.03 (0.95-1.13) | 0.463    |
| C-C motif chemokine 4 (CCL4)                  | CVD      | 1.02 (0.93-1.12) | 0.696    | 0.95 (0.87-1.04) | 0.297    |
| C-X-C motif chemokine 1 (CXCL1)               | CVD      | 1.00 (0.91-1.10) | 0.998    | 0.99 (0.90-1.09) | 0.842    |
| C-X-C motif chemokine 10 (CXCL10)             | Onco     | 1.08 (0.99-1.19) | 0.079    | 1.09 (0.99-1.19) | 0.088    |
| C-X-C motif chemokine 11 (CXCL11)             | Onco     | 1.10 (1.01-1.20) | 0.032    | 1.08 (0.98-1.18) | 0.111    |
| C-X-C motif chemokine 13 (CXCL13)             | Onco     | 1.07 (0.97-1.18) | 0.173    | 1.09 (0.99-1.21) | 0.091    |
| C-X-C motif chemokine 5 (CXCL5)               | Onco     | 0.98 (0.89-1.08) | 0.722    | 0.97 (0.88-1.06) | 0.472    |
| C-X-C motif chemokine 6 (CXCL6)               | CVD      | 0.95 (0.87-1.04) | 0.274    | 0.93 (0.85-1.02) | 0.141    |
| C-X-C motif chemokine 9 (CXCL9)               | Onco     | 1.11 (1.01-1.22) | 0.023    | 1.15 (1.05-1.26) | 2.00E-03 |
| C-X-C motif chemokine-16 (CXCL16)             | CVD      | 1.03 (0.94-1.13) | 0.56     | 0.99 (0.90-1.08) | 0.811    |
| Cadherin-3 (CDH3)                             | Onco     | 1.02 (0.93-1.11) | 0.685    | 0.92 (0.84-1.01) | 0.081    |
| Carbonic anhydrase IX (CAIX)                  | Onco     | 1.04 (0.95-1.13) | 0.417    | 1.03 (0.94-1.12) | 0.582    |
| Caspase-3 (CASP3)                             | Onco     | 1.00 (0.91-1.10) | 0.97     | 1.01 (0.92-1.11) | 0.814    |
| Caspase-8 (CASP8)                             | CVD      | 1.04 (0.95-1.13) | 0.392    | 0.99 (0.91-1.09) | 0.882    |
| Cathepsin D (CTSD)                            | CVD      | 1.05 (0.95-1.16) | 0.307    | 1.02 (0.92-1.12) | 0.754    |
| Cathepsin L1 (CTSL1)                          | CVD      | 1.10 (1.00-1.20) | 0.053    | 1.00 (0.91-1.10) | 0.986    |
| CD40 ligand (CD40L)                           | CVD/Onco | 0.96 (0.87-1.05) | 0.337    | 0.96 (0.88-1.05) | 0.345    |
| Chitinase-3-like protein (CH3L1)              | CVD      | 1.11 (1.01-1.21) | 0.025    | 1.02 (0.94-1.12) | 0.61     |
| Cyclin-dependent kinase inhibitor 1A (CDKN1A) | Onco     | 0.98 (0.89-1.07) | 0.607    | 0.99 (0.90-1.08) | 0.798    |
| Cystatin-B (CSTB)                             | CVD/Onco | 1.10 (1.00-1.21) | 0.057    | 1.04 (0.94-1.14) | 0.446    |
| Dickkopf-related protein-1 (Dkk1)             | CVD      | 0.97 (0.88-1.06) | 0.522    | 0.93 (0.85-1.02) | 0.12     |
| E-selectin (SELE)                             | CVD/Onco | 0.97 (0.88-1.07) | 0.553    | 0.98 (0.89-1.08) | 0.684    |
| Early activation antigen CD69 (CD60)          | Onco     | 1.03 (0.94-1.13) | 0.508    | 1.02 (0.93-1.12) | 0.642    |
| Endothelial cell-specific molecule 1 (ESM1)   | CVD      | 1.00 (0.92-1.10) | 0.933    | 0.95 (0.86-1.04) | 0.246    |
| Eosinophil cationic protein (ECP)             | CVD      | 1.06 (0.97-1.16) | 0.194    | 0.95 (0.86-1.04) | 0.259    |
| Epidermal growth factor (EGF)                 | CVD      | 0.99 (0.90-1.08) | 0.807    | 0.97 (0.89-1.06) | 0.462    |

|                                                                            |          |                  |          |                   |          |
|----------------------------------------------------------------------------|----------|------------------|----------|-------------------|----------|
| Epidermal growth factor receptor (EGFR)                                    | Onco     | 0.93 (0.86-1.02) | 0.13     | 0.84 (0.76-0.92)  | 2.60E-04 |
| Epididymal secretory protein E4 (HE4)                                      | Onco     | 1.22 (1.10-1.35) | 1.70E-04 | 1.13 (1.02-1.26)  | 0.023    |
| Epithelial cell adhesion molecule (EpCAM)                                  | Onco     | 1.01 (0.92-1.11) | 0.859    | 1.04 (0.94-1.14)  | 0.467    |
| Eukaryotic translation initiation factor 4B (eIF4B)                        | Onco     | 0.95 (0.87-1.05) | 0.338    | 1.00 (0.91-1.09)  | 0.986    |
| Extracellular matrix metalloproteinase inducer (EMMPRIN)                   | Onco     | 0.97 (0.90-1.04) | 0.412    | 0.97 (0.87-1.07)  | 0.527    |
| Ezrin (EZR)                                                                | Onco     | 0.98 (0.90-1.08) | 0.745    | 0.94 (0.86-1.04)  | 0.23     |
| Fas antigen ligand (FasL)                                                  | Onco     | 0.95 (0.87-1.04) | 0.263    | 0.87 (0.79-0.96)  | 7.00E-03 |
| FAS-associated death domain protein (FADD)                                 | Onco     | 1.07 (0.98-1.17) | 0.152    | 0.99 (0.90-1.08)  | 0.821    |
| Fatty acid-binding protein, adipocyte (FABP4)                              | CVD      | 0.99 (0.89-1.11) | 0.904    | 0.95 (0.85-1.06)  | 0.339    |
| Fibroblast growth factor 23 (FGF23)                                        | CVD      | 1.13 (1.04-1.24) | 5.30E-03 | 1.00 (0.91-1.10)  | 0.984    |
| Fms-related tyrosine kinase 3 ligand (Flt3L)                               | Onco     | 1.01 (0.92-1.11) | 0.814    | 0.98 (0.90-1.08)  | 0.695    |
| Folate receptor alpha (FRalpha)                                            | Onco     | 1.05 (0.96-1.15) | 0.323    | 0.99 (0.90-1.09)  | 0.855    |
| Follistatin (FS)                                                           | CVD/Onco | 1.03 (0.93-1.13) | 0.604    | 0.92 (0.83-1.01)  | 0.094    |
| Fractalkine (CX3CL1)                                                       | CVD      | 1.07 (0.98-1.17) | 0.121    | 1.00 (0.92-1.10)  | 0.939    |
| Furin (FUR)                                                                | Onco     | 1.03 (0.93-1.14) | 0.624    | 1.02 (0.92-1.14)  | 0.668    |
| Galanin peptides (GAL)                                                     | CVD      | 0.92 (0.84-1.02) | 0.112    | 0.91 (0.83-1.00)  | 0.055    |
| Galectin-3 (Gal3)                                                          | CVD      | 0.97 (0.89-1.06) | 0.521    | 0.92 (0.84-1.01)  | 0.087    |
| Growth hormone (GH)                                                        | CVD/Onco | 1.20 (1.07-1.34) | 1.50E-03 | 1.13 (1.011-1.27) | 0.035    |
| Growth/differentiation factor 15 (GDF15)                                   | CVD/Onco | 1.26 (1.14-1.38) | 3.00E-06 | 1.23 (1.11-1.35)  | 3.30E-05 |
| Heat shock 27 kDa protein (HSP27)                                          | CVD      | 0.95 (0.87-1.04) | 0.293    | 0.96 (0.88-1.05)  | 0.36     |
| Heparin-binding EGF-like growth factor (HBEGF)                             | CVD/Onco | 0.96 (0.88-1.05) | 0.407    | 0.95 (0.87-1.05)  | 0.322    |
| Hepatocyte growth factor (HGF)                                             | CVD/Onco | 0.99 (0.90-1.08) | 0.807    | 0.97 (0.89-1.06)  | 0.462    |
| ICOS ligand (ICOSLG)                                                       | Onco     | 0.94 (0.86-1.03) | 0.189    | 0.92 (0.84-1.01)  | 0.088    |
| Immunoglobulin-like transcript 3 (ILT3)                                    | Onco     | 1.08 (0.99-1.18) | 0.09     | 1.03 (0.94-1.12)  | 0.546    |
| Integrin alpha-1 (ITGA1)                                                   | Onco     | 1.06 (0.97-1.16) | 0.21     | 0.93 (0.85-1.03)  | 0.148    |
| Interleukin-1 receptor antagonist protein (IL1ra)                          | CVD/Onco | 1.03 (0.92-1.15) | 0.619    | 1.03 (0.93-1.14)  | 0.595    |
| Interleukin-12 (IL12)                                                      | Onco     | 1.07 (0.97-1.17) | 0.173    | 1.09 (0.99-1.21)  | 0.08     |
| Interleukin-16 (IL16)                                                      | CVD      | 0.98 (0.90-1.08) | 0.732    | 0.94 (0.85-1.03)  | 0.162    |
| Interleukin-17 receptor B (IL17RB)                                         | Onco     | 1.05 (0.96-1.15) | 0.294    | 0.91 (0.83-1.00)  | 0.041    |
| Interleukin-18 (IL18)                                                      | CVD      | 1.00 (0.91-1.10) | 0.997    | 0.97 (0.88-1.07)  | 0.51     |
| Interleukin-27 subunit alpha (IL27A)                                       | CVD      | 1.06 (0.97-1.16) | 0.219    | 1.03 (0.94-1.13)  | 0.511    |
| Interleukin-6 (IL6)                                                        | CVD/Onco | 1.14 (1.04-1.24) | 4.20E-03 | 1.11 (1.00-1.22)  | 0.045    |
| Interleukin-6 receptor subunit alpha (IL6RA)                               | CVD/Onco | 1.04 (0.95-1.14) | 0.419    | 1.00 (0.91-1.09)  | 0.96     |
| Interleukin-7 (IL7)                                                        | Onco     | 1.01 (0.92-1.11) | 0.812    | 0.97 (0.89-1.06)  | 0.509    |
| Interleukin-8 (IL8)                                                        | CVD/Onco | 1.07 (0.99-1.16) | 0.091    | 1.04 (0.94-1.14)  | 0.443    |
| Kallikrein-11 (hK11)                                                       | CVD/Onco | 1.00 (0.91-1.09) | 0.936    | 0.93 (0.85-1.02)  | 0.146    |
| Kallikrein-6 (KLK6)                                                        | CVD/Onco | 0.96 (0.88-1.05) | 0.426    | 0.91 (0.83-1.00)  | 0.039    |
| Latency-associated peptide transforming growth factor beta-1 (LAPTGFbeta1) | Onco     | 1.05 (0.96-1.15) | 0.279    | 0.98 (0.89-1.07)  | 0.602    |
| Lectin-like oxidized LDL receptor (LOX1)                                   | CVD      | 1.13 (1.03-1.23) | 9.20E-03 | 1.08 (0.99-1.19)  | 0.096    |
| Leptin (LEP)                                                               | CVD      | 0.92 (0.79-1.07) | 0.27     | 0.97 (0.83-1.12)  | 0.668    |

|                                                                |          |                  |          |                  |       |
|----------------------------------------------------------------|----------|------------------|----------|------------------|-------|
| Macrophage colony-stimulating factor-1 (CSF1)                  | CVD/Onco | 1.07 (0.97-1.18) | 0.148    | 1.01 (0.92-1.11) | 0.848 |
| Matrix metalloproteinase-1 (MMP1)                              | CVD/Onco | 1.08 (0.98-1.18) | 0.105    | 1.08 (0.99-1.18) | 0.075 |
| Matrix metalloproteinase-10 (MMP10)                            | CVD      | 0.98 (0.89-1.08) | 0.685    | 0.99 (0.90-1.09) | 0.832 |
| Matrix metalloproteinase-12 (MMP12)                            | CVD      | 1.10 (1.00-1.21) | 0.058    | 1.08 (0.98-1.19) | 0.108 |
| Matrix metalloproteinase-3 (MMP3)                              | CVD      | 1.10 (0.99-1.22) | 0.09     | 1.02 (0.92-1.14) | 0.678 |
| Matrix metalloproteinase-7 (MMP7)                              | CVD      | 1.09 (0.99-1.20) | 0.064    | 1.07 (0.97-1.17) | 0.187 |
| Melanoma-derived growth regulatory protein (MIA)               | Onco     | 1.01 (0.92-1.10) | 0.847    | 0.97 (0.88-1.06) | 0.5   |
| Melusin (ITGB1BP2)                                             | CVD      | 0.98 (0.90-1.08) | 0.691    | 1.02 (0.94-1.12) | 0.599 |
| Membrane-bound aminopeptidase P (mAmP)                         | CVD      | 1.02 (0.94-1.12) | 0.609    | 0.96 (0.88-1.05) | 0.378 |
| MHC class I polypeptide-related sequence A (MICA)              | Onco     | 0.91 (0.84-0.99) | 0.028    | 1.02 (0.93-1.12) | 0.678 |
| Midkine (MK)                                                   | Onco     | 1.09 (0.99-1.19) | 0.088    | 1.02 (0.93-1.12) | 0.71  |
| Monocyte chemotactic protein 1 (MCP1)                          | CVD/Onco | 1.06 (0.96-1.16) | 0.231    | 0.94 (0.86-1.03) | 0.17  |
| Myeloid differentiation primary response protein MyD88 (MYD88) | Onco     | 0.98 (0.89-1.07) | 0.638    | 1.00 (0.91-1.09) | 0.919 |
| Myeloperoxidase (MPO)                                          | CVD      | 1.11 (1.02-1.22) | 0.02     | 0.93 (0.85-1.03) | 0.162 |
| Myoglobin (MB)                                                 | CVD      | 0.93 (0.85-1.03) | 0.15     | 0.88 (0.80-0.98) | 0.014 |
| N-terminal pro-B-type natriuretic peptide (NTproBNP)           | CVD      | 1.17 (1.07-1.29) | 4.60E-04 | 1.12 (1.02-1.23) | 0.019 |
| NF-kappa-B essential modulator (NEMO)                          | CVD/Onco | 0.92 (0.84-1.01) | 0.077    | 1.01 (0.92-1.10) | 0.905 |
| NT-3 growth factor receptor (NTRK3)                            | Onco     | 0.98 (0.90-1.08) | 0.706    | 0.90 (0.82-0.99) | 0.029 |
| Osteoprotegerin (OPG)                                          | CVD      | 1.07 (0.97-1.17) | 0.182    | 1.02 (0.93-1.12) | 0.739 |
| Ovarian cancer-related tumor marker CA 125 (CA125)             | CVD/Onco | 1.10 (1.01-1.21) | 0.037    | 0.96 (0.88-1.05) | 0.404 |
| P-selectin glycoprotein ligand 1 (PSGL1)                       | CVD      | 0.95 (0.86-1.04) | 0.27     | 1.01 (0.92-1.11) | 0.8   |
| Pappalysin-1 (PAPPA)                                           | CVD      | 1.09 (0.99-1.20) | 0.073    | 0.95 (0.86-1.04) | 0.275 |
| Parkinson protein 7 (PARK7)                                    | Onco     | 1.00 (0.92-1.08) | 0.963    | 0.99 (0.90-1.09) | 0.866 |
| Pentraxin-related protein PTX3 (PTX3)                          | CVD      | 1.08 (0.98-1.18) | 0.104    | 0.97 (0.88-1.06) | 0.517 |
| Placenta growth factor (PIGF)                                  | CVD/Onco | 1.09 (0.99-1.20) | 0.081    | 0.98 (0.89-1.08) | 0.66  |
| Platelet endothelial cell adhesion molecule (PECAM1)           | CVD/Onco | 0.96 (0.88-1.05) | 0.394    | 0.97 (0.89-1.06) | 0.509 |
| Platelet-derived growth factor subunit B (PDGFsubunitB)        | CVD/Onco | 1.01 (0.92-1.11) | 0.764    | 0.95 (0.87-1.04) | 0.291 |
| Prolactin (PRL)                                                | CVD/Onco | 1.08 (0.98-1.19) | 0.111    | 0.93 (0.84-1.02) | 0.123 |
| Prostasin (PRSS8)                                              | Onco     | 1.12 (1.02-1.24) | 0.024    | 1.08 (0.97-1.20) | 0.148 |
| Proteinase-activated receptor 1 (PAR1)                         | CVD      | 0.97 (0.89-1.07) | 0.552    | 0.94 (0.86-1.03) | 0.181 |
| Proto-oncogene tyrosine-protein kinase Src (SRC)               | CVD      | 0.93 (0.84-1.02) | 0.101    | 0.98 (0.90-1.06) | 0.585 |
| Receptor for advanced glycosylation end products (RAGE)        | CVD      | 0.93 (0.85-1.01) | 0.099    | 0.94 (0.86-1.02) | 0.151 |
| Receptor tyrosine-protein kinase erbB-2 (ErbB2HER2)            | Onco     | 0.99 (0.91-1.08) | 0.852    | 0.94 (0.85-1.04) | 0.211 |
| Receptor tyrosine-protein kinase erbB-3 (ErbB3HER3)            | Onco     | 0.99 (0.90-1.09) | 0.885    | 0.91 (0.83-1.00) | 0.045 |
| Receptor tyrosine-protein kinase erbB-4 (ErbB4HER4)            | Onco     | 1.00 (0.91-1.10) | 0.944    | 0.91 (0.83-1.00) | 0.042 |
| Regenerating islet-derived protein 4 (REG4)                    | Onco     | 1.09 (0.99-1.19) | 0.087    | 0.99 (0.90-1.08) | 0.771 |
| Renin (REN)                                                    | CVD      | 1.04 (0.95-1.14) | 0.422    | 1.01 (0.92-1.11) | 0.89  |
| Resistin (RETN)                                                | CVD      | 1.04 (0.94-1.14) | 0.44     | 1.02 (0.94-1.12) | 0.609 |

|                                                               |          |                  |          |                  |          |
|---------------------------------------------------------------|----------|------------------|----------|------------------|----------|
| SIR2-like protein-2 (SIRT2)                                   | CVD      | 0.96 (0.88-1.05) | 0.405    | 0.99 (0.90-1.08) | 0.79     |
| Spondin-1 (SPON1)                                             | CVD      | 1.06 (0.97-1.16) | 0.218    | 0.99 (0.91-1.09) | 0.883    |
| ST2 protein (ST2)                                             | CVD      | 1.07 (0.97-1.18) | 0.163    | 1.06 (0.96-1.18) | 0.252    |
| Stem cell factor (SCF)                                        | CVD/Onco | 0.88 (0.81-0.96) | 5.80E-03 | 0.84 (0.76-0.92) | 1.60E-04 |
| Tartrate-resistant acid phosphatase type 5 (TRAP)             | Onco     | 1.05 (0.95-1.15) | 0.326    | 0.99 (0.90-1.09) | 0.894    |
| Thrombomodulin (TM)                                           | CVD      | 1.01 (0.92-1.11) | 0.784    | 0.91 (0.83-1.00) | 0.058    |
| Thrombopoietin (THPO)                                         | Onco     | 0.97 (0.89-1.07) | 0.579    | 0.93 (0.85-1.02) | 0.145    |
| Tissue injury molecule-1/KIM-1 (TIM)                          | CVD      | 1.17 (1.07-1.29) | 9.60E-04 | 1.08 (0.98-1.19) | 0.11     |
| Tissue factor (TF)                                            | CVD/Onco | 0.99 (0.90-1.08) | 0.759    | 0.95 (0.87-1.05) | 0.302    |
| Tissue-type plasminogen activator (tPA)                       | CVD      | 0.95 (0.87-1.05) | 0.31     | 1.05 (0.96-1.16) | 0.273    |
| TNF-related activation-induced cytokine (TRANCE)              | CVD      | 0.93 (0.85-1.02) | 0.125    | 0.94 (0.86-1.04) | 0.232    |
| TNF-related apoptosis-inducing ligand (TRAIL)                 | CVD      | 0.93 (0.85-1.02) | 0.117    | 0.91 (0.83-1.00) | 0.04     |
| TNF-related apoptosis-inducing ligand receptor 2 (TRAILR2)    | CVD/Onco | 1.14 (1.07-1.22) | 1.00E-04 | 1.01 (0.92-1.10) | 0.832    |
| Transforming growth factor alpha (TGFalpha)                   | Onco     | 1.12 (1.03-1.22) | 7.90E-03 | 1.02 (0.93-1.12) | 0.641    |
| Tumor necrosis factor ligand superfamily member 14 (TNFSF14)  | CVD/Onco | 1.03 (0.93-1.13) | 0.589    | 0.96 (0.87-1.05) | 0.332    |
| Tumor necrosis factor receptor 1 (TNFR1)                      | CVD/Onco | 1.04 (0.94-1.14) | 0.452    | 1.01 (0.92-1.12) | 0.784    |
| Tumor necrosis factor receptor 2 (TNFR2)                      | CVD/Onco | 1.07 (0.97-1.18) | 0.156    | 1.01 (0.91-1.11) | 0.906    |
| Tumor necrosis factor receptor superfamily member 4 (TNFRSF4) | Onco     | 1.06 (0.97-1.16) | 0.196    | 1.01 (0.92-1.11) | 0.86     |
| Tumor necrosis factor receptor superfamily member 5 (CD40)    | CVD      | 0.97 (0.88-1.06) | 0.467    | 1.02 (0.93-1.11) | 0.712    |
| Tumor necrosis factor receptor superfamily member 6 (FAS)     | CVD/Onco | 1.00 (0.91-1.10) | 0.99     | 0.94 (0.86-1.03) | 0.197    |
| Tyrosine-protein kinase Lyn (LYN)                             | Onco     | 0.98 (0.89-1.07) | 0.647    | 0.97 (0.89-1.06) | 0.553    |
| Tyrosine-protein phosphatase, non-receptor type 22 (PTPN22)   | Onco     | 1.04 (0.95-1.14) | 0.347    | 1.02 (0.93-1.12) | 0.651    |
| Urokinase plasminogen activator surface receptor (UPAR)       | CVD/Onco | 1.20 (1.08-1.32) | 3.70E-04 | 1.12 (1.01-1.23) | 0.031    |
| Vascular endothelial growth factor A (VEGFA)                  | CVD/Onco | 1.07 (0.97-1.17) | 0.192    | 0.99 (0.90-1.08) | 0.801    |
| Vascular endothelial growth factor D (VEGFD)                  | CVD/Onco | 0.97 (0.88-1.06) | 0.477    | 1.01 (0.92-1.12) | 0.769    |
| Vascular endothelial growth factor receptor 2 (VEGFR2)        | Onco     | 0.97 (0.88-1.07) | 0.508    | 0.88 (0.80-0.96) | 5.90E-03 |
| Vimentin (VIM)                                                | Onco     | 1.03 (0.94-1.13) | 0.512    | 0.96 (0.87-1.06) | 0.414    |

**Supplement Table 4.** Mean RSF-derived prediction error rates for all-cause mortality in the MDCS-CVA using in three RSF models in two random samples and the full study population.

| RSF model                         | Mean prediction error rate (95% CI) |                        |                                      |
|-----------------------------------|-------------------------------------|------------------------|--------------------------------------|
|                                   | Random sample 1                     | Random sample 2        | Full study population <sup>###</sup> |
| Only covariates*                  | 0.3075 (0.3073-0.3078)              | 0.3114 (0.3111-0.3117) | 0.3013 (0.3011-0.3016)               |
| Covariates and selected proteins# | 0.2683 (0.2679-0.2686)              | 0.2814 (0.2811-0.2818) | 0.2717 (0.2715-0.2719)               |
| Covariates and all proteins##     | 0.2853 (0.2848-0.2858)              | 0.3012 (0.3008-0.3017) | 0.2799 (0.2796-0.2803)               |

\* Covariates included age, sex, smoking status, BMI, educational level, history of hypertension, prevalent diabetes mellitus, C-reactive protein, HbA1c, and LDL-cholesterol.

# Selected proteins based on the random survival forest backward algorithm. In total, 49 and 30 proteins were retained in random sample 1 and 2, respectively.

## RSF model including covariates and all 138 proteins.

### RSF models in full study population including covariates only, all proteins and a model including covariates and proteins retained using the RSF backward algorithm in both random samples (21 proteins; FABP4, FasL, GDF15, HE4, HGF, IL12, IL6, mAmP, MMP1, MMP12, MYD88, NTproBNP, PRSS8, PSGL1, PTPN22, PTX3, RAGE, REN, SCF, THPO, TIM).

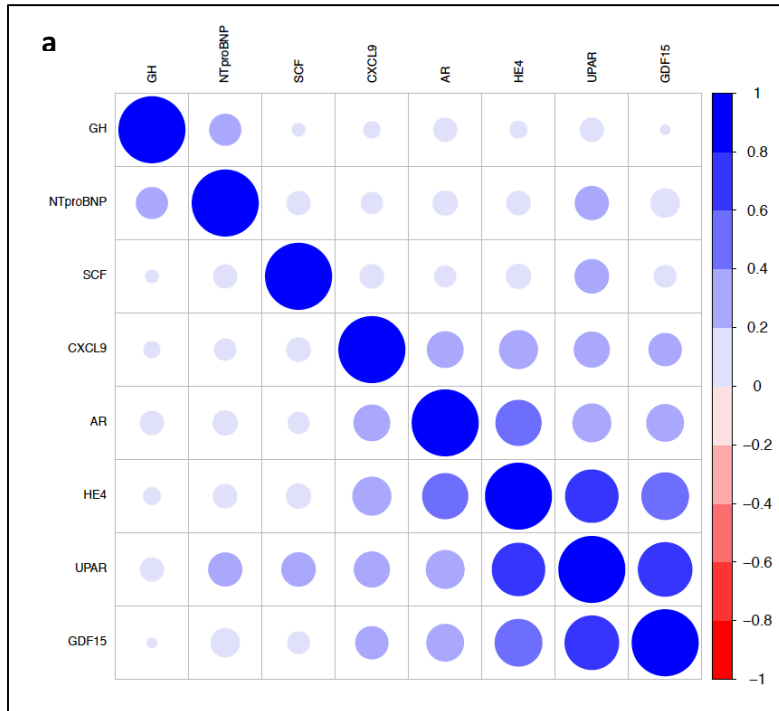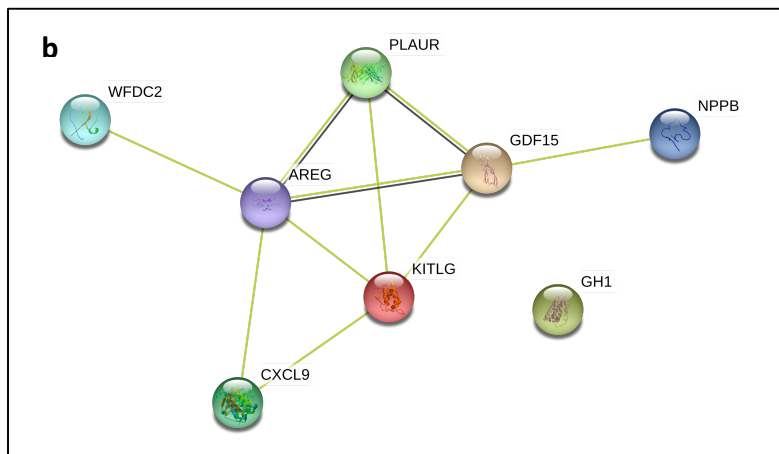

**Supplement Figure 8.** Heat map of Pearson correlation coefficients (a) and pathway analysis (b) for the top eight proteins associated with all-cause mortality in the MDCS-CVA. The pathway analysis was performed using the STRING database Version 11.0. Nodes represent proteins and edges represent protein-protein associations. All sources of interactions were probed and minimum required interaction score was set at low confidence (0.150). No known interactions (curated or experimental) were identified. Green edges represent connections by textmining and black edges represent putative co-expression. Abbreviations from the STRING database were used in the pathway analysis. Abbreviations: AREG – amphiregulin (AREG), WFDC2 – epididymal secretory protein E4 (HE4), PLAUR – urokinase plasminogen activator surface receptor (UPAR), GH1 – growth hormone (GH), NPPB – N-terminal pro-B-type natriuretic peptide (NTproBNP), CXCL9 – C-X-C motif chemokine 9 (CXCL9), KITLG – stem cell factor (SCF), GDF15 – growth/differentiation factor 15 (GDF15).

**Supplement Table 5.** Summary of proteins associated with all-cause mortality in two random samples of the MDCS-CVA using different methods. Proteins associated with all-cause mortality in only one random sample are denoted (+) and proteins associated with all-cause mortality in both random samples are denoted (++) . All analyses adjusted for age, sex, smoking status, BMI, educational level, history of hypertension, prevalent diabetes mellitus, C-reactive protein (ln-transformed), HbA1c (ln-transformed), and LDL-cholesterol.

| Protein name (abbreviation)                   | Single protein | Stepwise Cox | Lasso Cox | RSF |
|-----------------------------------------------|----------------|--------------|-----------|-----|
| Adrenomedullin (AM)                           |                | +            | +         |     |
| Agouti-related protein (AGRP)                 |                |              |           |     |
| Amphiregulin (AR)                             | ++             |              | +         | +   |
| Angiotensin-1 receptor (TIE2)                 |                |              |           |     |
| B-cell activating factor (BAFF)               |                |              |           |     |
| C-C motif chemokine 19 (CCL19)                | +              | +            | +         |     |
| C-C motif chemokine 20 (CCL20)                |                |              |           |     |
| C-C motif chemokine 3 (CCL3)                  |                |              |           |     |
| C-C motif chemokine 4 (CCL4)                  |                |              | +         |     |
| C-X-C motif chemokine 1 (CXCL1)               |                |              |           |     |
| C-X-C motif chemokine 10 (CXCL10)             |                |              |           | +   |
| C-X-C motif chemokine 11 (CXCL11)             | +              | +            |           | +   |
| C-X-C motif chemokine 13 (CXCL13)             |                |              | +         | +   |
| C-X-C motif chemokine 5 (CXCL5)               |                |              |           |     |
| C-X-C motif chemokine 6 (CXCL6)               |                |              |           |     |
| C-X-C motif chemokine 9 (CXCL9)               | ++             | +            | ++        | +   |
| C-X-C motif chemokine-16 8CXCL16)             |                |              |           |     |
| Cadherin-3 (CDH3)                             |                |              |           |     |
| Carbonic anhydrase IX (CAIX)                  |                |              |           |     |
| Caspase-3 (CASP3)                             |                | ++           |           |     |
| Caspase-8 (CASP8)                             |                |              |           |     |
| Cathepsin D (CTSD)                            |                |              |           | +   |
| Cathepsin L1 (CTSL1)                          |                |              |           |     |
| CD40 ligand (CD40L)                           |                | +            |           | +   |
| Chitinase-3-like protein (CHI3L1)             | +              |              |           | +   |
| Cyclin-dependent kinase inhibitor 1A (CDKN1A) |                |              |           |     |
| Cystatin-B (CSTB)                             |                |              |           |     |
| Dickkopf-related protein-1 (Dkk1)             |                |              |           |     |
| E-selectin (SELE)                             |                |              | +         |     |
| Early activation antigen CD69 (CD60)          |                |              |           |     |
| Endothelial cell-specific molecule 1 (ESM1)   |                |              |           |     |
| Eosinophil cationic protein (ECP)             |                |              |           |     |
| Epidermal growth factor (EGF)                 |                |              |           |     |
| Epidermal growth factor receptor (EGFR)       | +              | ++           | ++        | +   |

|                                                                            |    |    |    |    |
|----------------------------------------------------------------------------|----|----|----|----|
| Epididymal secretory protein E4 (HE4)                                      | ++ | ++ | ++ | ++ |
| Epithelial cell adhesion molecule (EpCAM)                                  |    |    |    |    |
| Eukaryotic translation initiation factor 4B (eIF4B)                        |    |    |    |    |
| Extracellular matrix metalloproteinase inducer (EMMPRIN)                   |    | +  | +  | +  |
| Ezrin (EZR)                                                                |    | ++ | ++ |    |
| Fas antigen ligand (FasL)                                                  | +  |    | +  | ++ |
| FAS-associated death domain protein (FADD)                                 |    |    | +  |    |
| Fatty acid-binding protein, adipocyte (FABP4)                              |    |    |    | ++ |
| Fibroblast growth factor 23 (FGF23)                                        | +  |    |    |    |
| Fms-related tyrosine kinase 3 ligand (Flt3L)                               |    |    |    | +  |
| Folate receptor alpha (FRalpha)                                            |    |    |    |    |
| Follistatin (FS)                                                           |    |    | +  |    |
| Fractalkine (CX3CL1)                                                       |    |    |    |    |
| Furin (FUR)                                                                |    |    |    |    |
| Galanin peptides (GAL)                                                     |    |    | +  |    |
| Galectin-3 (Gal3)                                                          |    |    | +  | +  |
| Growth hormone (GH)                                                        | ++ |    | ++ | +  |
| Growth/differentiation factor 15 (GDF15)                                   | ++ | ++ | ++ | ++ |
| Heat shock 27 kDa protein (HSP27)                                          |    |    | +  |    |
| Heparin-binding EGF-like growth factor (HBEGF)                             |    |    |    |    |
| Hepatocyte growth factor (HGF)                                             |    |    |    | ++ |
| ICOS ligand (ICOSLG)                                                       |    | +  | +  |    |
| Immunoglobulin-like transcript 3 (ILT3)                                    |    |    |    |    |
| Integrin alpha-1 (ITGA1)                                                   |    | +  |    | +  |
| Interleukin-1 receptor antagonist protein (IL1ra)                          |    |    |    | +  |
| Interleukin-12 (IL12)                                                      |    | +  |    | ++ |
| Interleukin-16 (IL16)                                                      |    |    | +  |    |
| Interleukin-17 receptor B (IL17RB)                                         | +  | +  | +  |    |
| Interleukin-18 (IL18)                                                      |    |    | +  |    |
| Interleukin-27 subunit alpha (IL27A)                                       |    |    |    | +  |
| Interleukin-6 (IL6)                                                        | ++ |    | +  | ++ |
| Interleukin-6 receptor subunit alpha (IL6RA)                               |    |    |    |    |
| Interleukin-7 (IL7)                                                        |    |    |    |    |
| Interleukin-8 (IL8)                                                        |    |    |    | +  |
| Kallikrein-11 (hK11)                                                       |    |    |    | +  |
| Kallikrein-6 (KLK6)                                                        | +  | +  | ++ | +  |
| Latency-associated peptide transforming growth factor beta-1 (LAPTGFbeta1) |    |    |    |    |
| Lectin-like oxidized LDL receptor (LOX1)                                   | +  |    |    |    |
| Leptin (LEP)                                                               |    |    |    | +  |
| Macrophage colony-stimulating factor-1 (CSF1)                              |    |    |    |    |
| Matrix metalloproteinase-1 (MMP1)                                          |    |    |    | ++ |



|                                                                |    |    |    |    |
|----------------------------------------------------------------|----|----|----|----|
| Matrix metalloproteinase-10 (MMP10)                            |    | +  | +  |    |
| Matrix metalloproteinase-12 (MMP12)                            |    |    |    | ++ |
| Matrix metalloproteinase-3 (MMP3)                              |    |    |    | +  |
| Matrix metalloproteinase-7 (MMP7)                              |    |    |    |    |
| Melanoma-derived growth regulatory protein (MIA)               |    |    |    |    |
| Melusin (ITGB1BP2)                                             |    |    |    | +  |
| Membrane-bound aminopeptidase P (mAmP)                         |    |    |    | ++ |
| MHC class I polypeptide-related sequence A (MICA)              | +  | +  | +  | +  |
| Midkine (MK)                                                   |    |    |    | +  |
| Monocyte chemotactic protein 1 (MCP1)                          |    |    | +  |    |
| Myeloid differentiation primary response protein MyD88 (MYD88) |    |    |    | ++ |
| Myeloperoxidase (MPO)                                          | +  | +  | +  | +  |
| Myoglobin (MB)                                                 | +  |    | ++ | +  |
| N-terminal pro-B-type natriuretic peptide (NTproBNP)           | ++ | ++ | ++ | ++ |
| NF-kappa-B essential modulator (NEMO)                          |    |    | +  | +  |
| NT-3 growth factor receptor (NTRK3)                            |    |    |    |    |
| Osteoprotegerin (OPG)                                          |    |    |    |    |
| Ovarian cancer-related tumor marker CA 125 (CA125)             | +  | +  |    | +  |
| P-selectin glycoprotein ligand 1 (PSGL1)                       |    |    |    | ++ |
| Pappalysin-1 (PAPPA)                                           |    |    |    | +  |
| Parkinson protein 7 (PARK7)                                    |    |    |    |    |
| Pentraxin-related protein PTX3 (PTX3)                          |    |    |    | ++ |
| Placenta growth factor (PlGF)                                  |    | +  |    |    |
| Platelet endothelial cell adhesion molecule (PECAM1)           |    |    |    |    |
| Platelet-derived growth factor subunit B (PDGFsubunitB)        |    |    |    |    |
| Prolactin (PRL)                                                |    |    | +  |    |
| Prostasin (PRSS8)                                              | +  |    |    | ++ |
| Proteinase-activated receptor 1 (PAR1)                         |    |    |    |    |
| Proto-oncogene tyrosine-protein kinase Src (SRC)               |    |    |    | +  |
| Receptor for advanced glycosylation end products (RAGE)        |    |    | +  | ++ |
| Receptor tyrosine-protein kinase erbB-2 (ErbB2HER2)            |    |    |    |    |
| Receptor tyrosine-protein kinase erbB-3 (ErbB3HER3)            | +  | +  |    |    |
| Receptor tyrosine-protein kinase erbB-4 (ErbB4HER4)            |    |    |    | +  |
| Regenerating islet-derived protein 4 (REG4)                    |    |    |    |    |
| Renin (REN)                                                    |    |    |    | ++ |
| Resistin (RETN)                                                |    |    |    |    |
| SIR2-like protein-2 (SIRT2)                                    |    | +  |    |    |
| Spondin-1 (SPON1)                                              |    |    |    |    |
| ST2 protein (ST2)                                              |    | +  |    |    |
| Stem cell factor (SCF)                                         | ++ |    | ++ | ++ |
| Tartrate-resistant acid phosphatase type 5 (TRAP)              |    |    |    |    |

|                                                               |    |   |    |    |
|---------------------------------------------------------------|----|---|----|----|
| Thrombomodulin (TM)                                           |    |   |    |    |
| Thrombopoietin (THPO)                                         |    |   |    | ++ |
| Tissue injury molecule-1/KIM-1 (TIM)                          | +  | + | ++ | ++ |
| Tissue factor (TF)                                            |    |   |    |    |
| Tissue-type plasminogen activator (tPA)                       |    | + |    |    |
| TNF-related activation-induced cytokine (TRANCE)              |    |   |    |    |
| TNF-related apoptosis-inducing ligand (TRAIL)                 | +  | + | ++ |    |
| TNF-related apoptosis-inducing ligand receptor 2 (TRAILR2)    | +  |   |    | +  |
| Transforming growth factor alpha (TGFalpha)                   | +  |   | +  |    |
| Tumor necrosis factor ligand superfamily member 14 (TNFSF14)  |    |   |    |    |
| Tumor necrosis factor receptor 1 (TNFR1)                      |    |   |    |    |
| Tumor necrosis factor receptor 2 (TNFR2)                      |    | + |    | +  |
| Tumor necrosis factor receptor superfamily member 4 (TNFRSF4) |    |   |    | +  |
| Tumor necrosis factor receptor superfamily member 5 (CD40)    |    |   |    |    |
| Tumor necrosis factor receptor superfamily member 6 (FAS)     |    |   |    |    |
| Tyrosine-protein kinase Lyn (LYN)                             |    |   |    |    |
| Tyrosine-protein phosphatase, non-receptor type 22 (PTPN22)   |    |   |    | ++ |
| Urokinase plasminogen activator surface receptor (UPAR)       | ++ | + | ++ | +  |
| Vascular endothelial growth factor A (VEGFA)                  |    |   |    |    |
| Vascular endothelial growth factor D (VEGFD)                  |    |   |    | +  |
| Vascular endothelial growth factor receptor 2 (VEGFR2)        | +  |   | +  |    |
| Vimentin (VIM)                                                |    |   |    | +  |

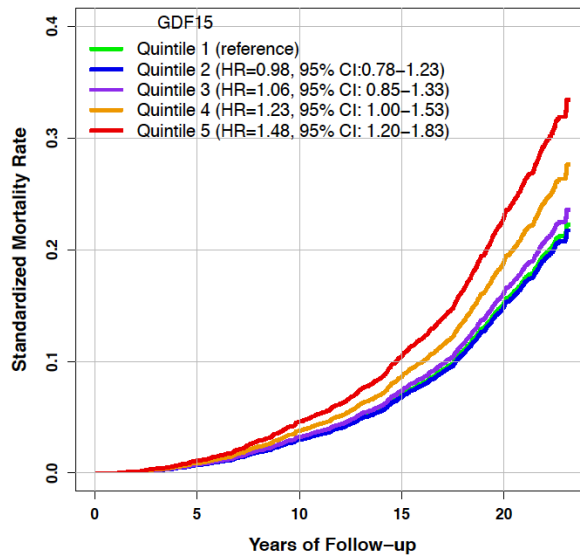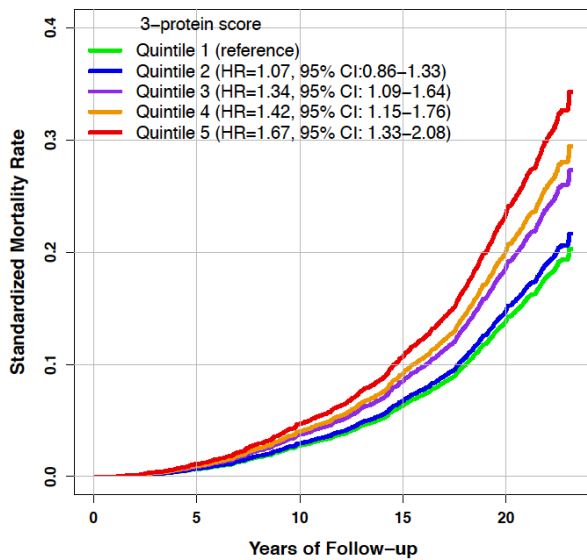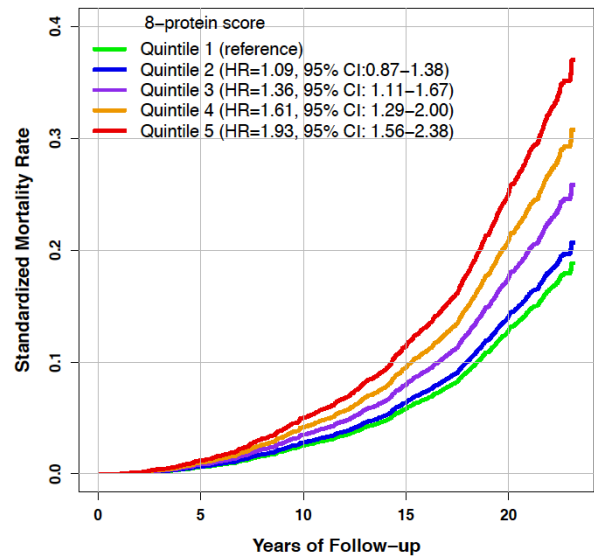

**Supplement Figure 9.** Standardized cumulative hazard plots of all-cause mortality by quintiles of protein scores in the MDCS-CVA (N=3,918). Cox regression models were adjusted for age, sex, smoking status, BMI, educational level, history of hypertension, prevalent diabetes mellitus, C-reactive protein, HbA1c, and LDL-cholesterol.

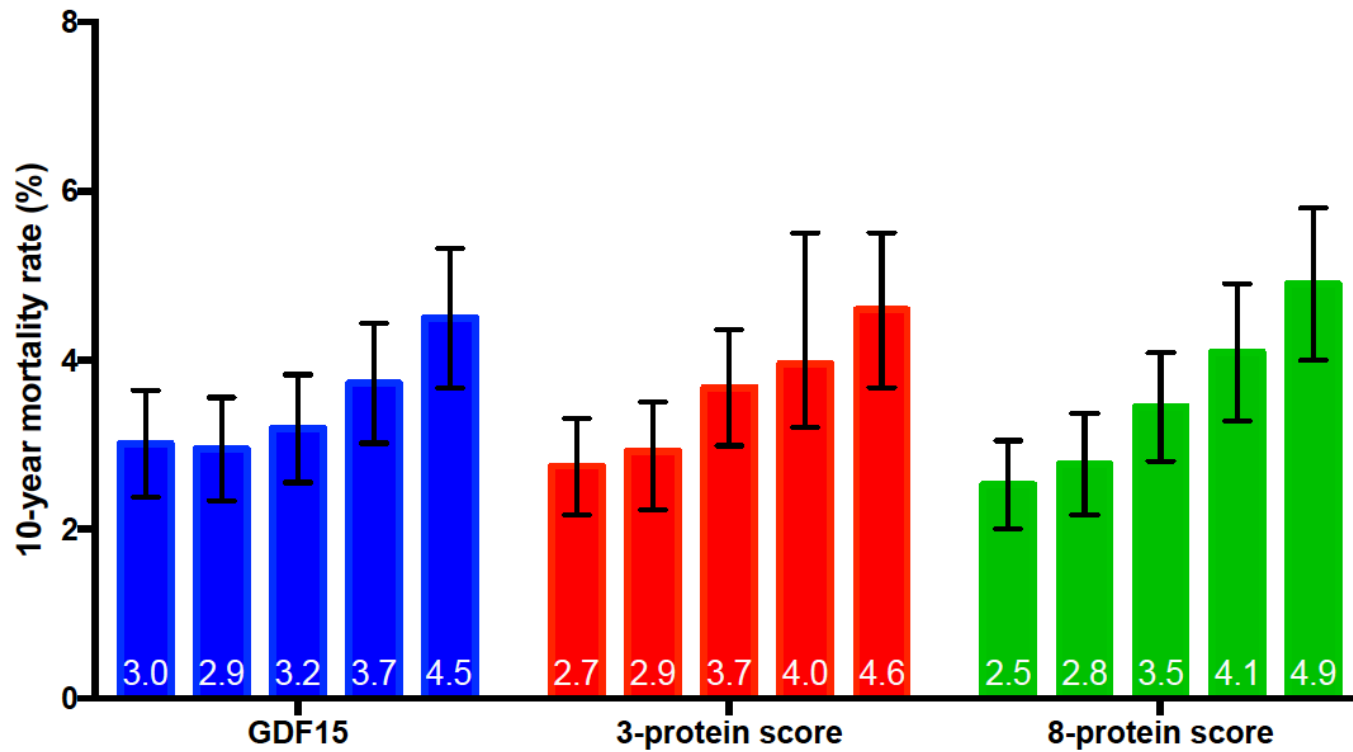

**Supplement Figure 10.** Standardized 10-year risk of all-cause mortality (%) across quintiles of protein scores in the MDCS-CVA (N=3,918). Absolute risk estimates adjusted for age, sex, smoking status, BMI, educational level, history of hypertension, prevalent diabetes mellitus, C-reactive protein, HbA1c, and LDL-cholesterol.
